# Supplementary material
Source: publisher figshare collection journal article supplement (https://springernature.figshare.com/ndownloader/files/7180613)
Supplement: Supplementary file [file 7180613]

**Section 0: Respondent Screening for Children 0-5 Months**

Participant's Phone Number \_\_\_\_\_ Interviewer's Name: \_\_\_\_\_ Survey Site \_\_\_\_\_ Survey Result \_\_\_\_\_ (1=complete; 2= partially complete; 3=refused to take the survey) Date of Interview \_\_\_/\_\_\_/\_\_\_ Identification Number: \_\_\_ Data Entry Clerk Name: \_\_\_\_\_ Date Entered: \_\_\_/\_\_\_/\_\_\_

**INSTRUCTIONS TO INTERVIEWER: IF THE WOMEN GAVE VERBAL CONSENT TO THE SURVEY, ASK THESE QUESTIONS IN A PRIVATE AREA. IF SHE DOES NOT WANT TO ANSWER SOME OF THE QUESTIONS, REASSURE HER THAT SHE CAN REFUSE TO ANSWER ANY OF THEM**

| No.  | QUESTIONS AND FILTERS                                                                                                                                                                                                                                                                                                      | CODING CATEGORIES                                                                                                                                                                                                                                                                                                                                                                                                                                                   | SKIP TO |
|------|----------------------------------------------------------------------------------------------------------------------------------------------------------------------------------------------------------------------------------------------------------------------------------------------------------------------------|---------------------------------------------------------------------------------------------------------------------------------------------------------------------------------------------------------------------------------------------------------------------------------------------------------------------------------------------------------------------------------------------------------------------------------------------------------------------|---------|
| Q001 | <p><i>Do you have a child who is less than 6 months old?</i><br/> <b>IF INFANT IS 6 MONTHS OR MORE, THE MOTHER SHOULD NOT BE INTERVIEWED WITH THIS QUESTIONNAIRE</b></p>                                                                                                                                                   | <p>YES .....01<br/>                     NO.....00</p>                                                                                                                                                                                                                                                                                                                                                                                                               |         |
| Q002 | <p><i>What is the date of birth of the child?</i><br/> <b>IF THERE IS NO DOCUMENT SHOWING THE CHILD'S DOB, ASK THE MOTHER OR CAREGIVER IF SHE KNOWS THE CHILD'S DOB. RECORD HER RESPONSE.</b></p> <p><b>IF YOU CANNOT OBTAIN DOB FROM A CARD OR THE MOTHER, YOU WILL NEED AND ASK THE MOTHER HOW OLD THE CHILD IS.</b></p> | <p align="center">____/____/____<br/>                     DD MM YY</p>                                                                                                                                                                                                                                                                                                                                                                                              |         |
| Q003 | <p><i>Source for date of birth</i><br/> <b>CARD COULD BE AN IDENTIFICATION CARD, A HEALTH OR IMMUNIZATION CARD, A BIRTH CERTIFICATE OR A BAPTISMAL CERTIFICATE</b></p>                                                                                                                                                     | <p><b>Circle number not responses</b><br/>                     CARD -----&gt; 1<br/>                     CAREGIVER-----&gt; 2<br/>                     DON'T KNOW-----&gt; 8</p>                                                                                                                                                                                                                                                                                    |         |
| Q004 | <p><i>How old are you?</i><br/> <b>IF CAREGIVER IS OLDER THAN 60 YEARS OR YOUNGER THAN 21 DO NOT CONTINUE. IF THE MOTHER IS OLDER THAN 60 YEARS OR YOUNGER THAN 18 YEARS DO NOT CONTINUE.</b></p>                                                                                                                          | <p><input type="text"/> <input type="text"/><br/>                     AGE IN YEARS</p> <p>DON'T KNOW.....98<br/>                     NO RESPONSE.....99</p>                                                                                                                                                                                                                                                                                                         |         |
| Q005 | <p><i>Have you been interviewed about breastfeeding and child feeding in the last five months?</i></p>                                                                                                                                                                                                                     | <p>YES .....01<br/>                     NO.....00</p>                                                                                                                                                                                                                                                                                                                                                                                                               | →Q007   |
| Q006 | <p><i>Where were you interviewed?</i><br/> <b>IF CAREGIVER NAMED ANY OF THE SITES LISTED IN THE COLUMN TO THE RIGHT THANK HIM OR HER AND DO NOT CONTINUE</b></p>                                                                                                                                                           | <p>BANSO BAPTIST HOSPITAL.....01<br/>                     NW REGIONAL HOSPITAL.....02<br/>                     MBINGO BAPTIST HOSPITAL.....03<br/>                     BELO BAPTIST HEALTH CENTER.....04<br/>                     BANGOLAN HEALTH CENTER .....05<br/>                     CDC MUKONJE HEALTH CENTER.....06<br/>                     BAPTIST HOSPITAL MUTENGENE.....07<br/>                     TIKO HOLFORT<br/>                     CMA.....08</p> |         |
| Q007 | <p><i>Has the child attended IWC elsewhere or been to any other health facilities?</i></p>                                                                                                                                                                                                                                 | <p>YES .....01<br/>                     NO.....00</p>                                                                                                                                                                                                                                                                                                                                                                                                               |         |

## **CLINIC-BASED SURVEY**

### **FOR USE WITH**

## **CAREGIVERS OF INFANTS AGE 0 TO LESS THAN 6 MONTHS OLD**

### Asking questions and recording answers

With the exception of questions 401-401, all questions in this module are based on mothers' (or other caregivers') recall. It is very important that you ask each question exactly as it is written on the questionnaire. If the mother or caregiver does not understand the question, you may need to use extra probing questions. Probing questions are discussed during interviewer training. It is important that all interviewers use the same probing questions.

In addition to the questions, there are statements that appear in all capital letters. These are interviewer instructions, and should not be read aloud to the mother/caregiver.

Most questions have pre-coded responses. It is important that you do not read these choices aloud. When you ask a question, you should listen to the mother's/caregiver's answer, then circle the code next to the category that best matches her answer.

### **Q.201: Ever breastfed child**

In this question it does not matter how long the mother breastfed the child, only whether or not she ever gave the child the breast milk.

### **Q.203: Currently breastfeeding**

For Question 203, it does not matter if the mother is giving (NAME) other liquids or foods as well as breast milk; what is of interest is if the infant or child is breastfeeding at all. (NAME refers to child's name.)

### **Q.204: Duration of breastfeeding**

This question is only for mothers who are no longer breastfeeding the infant or child in question. It is important to try to get as accurate information as possible. If the caregiver says she cannot remember how long she breastfed the infant or child, urge her to think about it for a while, or ask her if she remembers how old the infant or child was when she completely stopped breastfeeding him/her. If the mother gives an approximate answer, such as "about one year," establish if it was exactly one year or how much more or less.

Record the number of months when the mother completely stopped breastfeeding the infant or child. It does not matter if she was giving the infant or child other liquids or foods in addition to breast milk; you are simply recording how many months she breastfed the infant or child.

### **Qs.211, 212 Other Liquids and foods given**

The main purpose of questions 211 and 212 is to obtain a better picture of the diversity of the child's diet. You will ask the mother or other caregiver about the types of liquids and foods given to the child the day preceding the interview ("yesterday during the day or at night").

Question 211 asks about different liquids and foods given yesterday. It is important to ask about all the different kinds of liquids and foods. One reason is that for almost all infants less than 6 months old, only breast milk is recommended. We need to know if young infants are getting other liquids.

Read the question slowly and then read the liquids and foods in the list. Wait for the mother's/caregiver's response after each liquid or food and record whether the infant or child had each liquid (or group of liquids).

Question 212 asks about other liquids and foods the caregiver gives to the child, but may not have given yesterday. Do not read out these foods, but ask if the caregiver has ever given other foods or liquids besides breast milk.

Some foods in the list are listed as a single item – for example, vegetables – but may usually be eaten in a sauce, soup or stew. If the infant or child has eaten a mixed food like a sauce, soup, or stew, record all the food groups in the mixed food. For example, if the child ate a stew of beans, tomatoes, and green leaves, there should be a check mark for each of the three food groups that contain these foods.

Do not check off foods that have been added in very small amounts, or for seasoning. For example, if a spoon of pepe is added to a pot of stew, do not record that the infant or child has eaten vegetable. If one chili pepper is included in the family pot, do not record that as an "other fruit or vegetable."

| <b><i>I WILL START WITH A FEW QUESTIONS ABOUT YOUR OWN BACKGROUND</i></b> |                                                                                              |                                                                                                                                                                                                     |             |
|---------------------------------------------------------------------------|----------------------------------------------------------------------------------------------|-----------------------------------------------------------------------------------------------------------------------------------------------------------------------------------------------------|-------------|
| <b>NO.</b>                                                                | <b>QUESTIONS AND FILTERS</b>                                                                 | <b>CODING CATEGORIES</b>                                                                                                                                                                            | <b>SKIP</b> |
| <b>Q101</b>                                                               | <i>Is the respondent male or female?</i>                                                     | FEMALE.....01<br>MALE.....02                                                                                                                                                                        |             |
| <b>Q102</b>                                                               | <i>Are you the child's biological mother or father?</i>                                      | NO.....00<br>YES.....01                                                                                                                                                                             |             |
| <b>Q103</b>                                                               | <i>How many years of school have you completed, without repeating?</i>                       | <input type="text"/> YEARS COMPLETED<br>DON'T KNOW.....98<br>NO RESPONSE.....99                                                                                                                     |             |
| <b>Q104</b>                                                               | <i>What is your religion?</i>                                                                | CHRISTIAN.....01<br>MUSLIM.....02<br>TRADITIONAL.....03<br>NO RELIGION.....04<br>OTHER (SPECIFY): .....05                                                                                           |             |
| <b>Q105</b>                                                               | <i>What is your main occupation?</i><br><b>WHAT KIND OF WORK DO YOU DO MOST OF THE TIME?</b> | SELF-EMPLOYED.....01<br>CIVIL SERVANT.....02<br>HEALTH WORKER.....03<br>TECHNICIAN.....04<br>FARMER.....05<br>STUDENT.....06<br>OTHER (SPECIFY): .....07<br>DON'T KNOW.....98<br>NO RESPONSE.....99 |             |
| <b>Q106</b>                                                               | <i>What is your marital status?</i>                                                          | MARRIED.....01<br>COHABITING.....02<br>SINGLE.....03<br>WIDOWED.....04<br>SEPARATED/DIVORCED.....05<br>DON'T KNOW.....98<br>NO RESPONSE.....99                                                      |             |
| <b>Q107</b>                                                               | <i>Which of the following items does your family own? (Circle all that apply)</i>            | Y= YES, N=NO<br>Y N<br>RADIO.....1 0<br>TELEVISION.....1 0<br>MOTORBIKE.....1 0<br>CAR.....1 0                                                                                                      |             |
| <b>Q108</b>                                                               | <i>How many pregnancies have you had before?</i><br><b>ONLY ASK TO FEMALE PARTICIPANTS</b>   | NONE.....00<br>ONE.....01<br>TWO.....02<br>THREE.....03<br>FOUR.....04<br>MORE THAN FIVE.....05<br>OTHER, SPECIFY.....06<br>DON'T KNOW.....98<br>NO RESPONSE.....99                                 | →Q201       |
| <b>Q109</b>                                                               | <i>Out of the pregnancies how many children are alive?</i>                                   | NONE.....00<br>ONE.....01<br>TWO.....02<br>THREE.....03<br>FOUR.....04<br>FIVE.....05<br>MORE THAN FIVE.....06<br>OTHER, SPECIFY: .....07<br>DON'T KNOW.....98<br>NO RESPONSE.....99                |             |

## Section 2: Infant Feeding

| No.                                                                | Questions and filters                                                                                                                                                       | Coding categories                                                                                                                                                                                                                                                                                                                                                                                                                                  | Skip to                                                                                                              |
|--------------------------------------------------------------------|-----------------------------------------------------------------------------------------------------------------------------------------------------------------------------|----------------------------------------------------------------------------------------------------------------------------------------------------------------------------------------------------------------------------------------------------------------------------------------------------------------------------------------------------------------------------------------------------------------------------------------------------|----------------------------------------------------------------------------------------------------------------------|
| <b><i>NOW I'D LIKE TO ASK YOU A FEW QUESTIONS ABOUT (NAME)</i></b> |                                                                                                                                                                             |                                                                                                                                                                                                                                                                                                                                                                                                                                                    |                                                                                                                      |
|                                                                    |                                                                                                                                                                             | <b>Circle number not responses</b>                                                                                                                                                                                                                                                                                                                                                                                                                 |                                                                                                                      |
| Q201                                                               | <i>Has [NAME] ever breastfed?</i>                                                                                                                                           | YES .....01<br>NO.....00                                                                                                                                                                                                                                                                                                                                                                                                                           | →203                                                                                                                 |
| Q202                                                               | <i>What was the <u>main</u> reason [NAME] was never breastfed?</i><br><br><b>DO NOT READ RESPONSES</b>                                                                      | MOTHER ILL/WEAK.....01<br>CHILD ILL/WEAK.....02<br>NIPPLE/BREAST PROBLEM.....03<br>INSUFFICIENT MILK .....04<br>MOTHER WORKING/PLANNING TO WORK...05<br>CHILD REFUSED .....06<br>STARTED CONTRACEPTIVES.....07<br>WORRIED ABOUT HIV/AIDS.....08<br>DOCTOR'S ADVICE .....09<br>OTHER HEALTH PROVIDER'S ADVICE.....10<br>SPECIFY:<br>ADVICE OF FAMILY MEMBER/FRIENDS .....11<br>OTHER, SPECIFY: .....12<br>DON'T KNOW .....98<br>NO RESPONSE .....99 | →301<br>→301<br>→301<br>→301<br>→301<br>→301<br>→301<br>→301<br>→301<br>→301<br>→301<br>→301<br>→301<br>→301<br>→301 |
| Q203                                                               | <i>Is [NAME] still receiving breastfed milk?</i>                                                                                                                            | YES.....01<br>NO.....00                                                                                                                                                                                                                                                                                                                                                                                                                            | →205                                                                                                                 |
| Q204                                                               | <i>How long do you think [NAME] will take breast milk?</i>                                                                                                                  | NUMBER OF MONTHS .....[ ][ ]<br><br>DON'T KNOW .....98                                                                                                                                                                                                                                                                                                                                                                                             | →207<br>→207                                                                                                         |
| Q205                                                               | <i>For how many months was [NAME] breastfed?</i><br><br><b>IF LESS THAN 1 MONTH, RECORD '0'.</b>                                                                            | NUMBER OF MONTHS .....[ ][ ]<br><br>DON'T REMEMBER .....98                                                                                                                                                                                                                                                                                                                                                                                         |                                                                                                                      |
| Q206                                                               | <i>Why did you or the mother stop breastfeeding [NAME]?</i><br><br><b>IF MORE THAN ONE ANSWER GIVEN, PROBE FOR <u>MAIN</u> REASON.</b><br><br><b>DO NOT READ RESPONSES.</b> | MOTHER ILL/WEAK.....01<br>CHILD ILL/WEAK.....02<br>NIPPLE/BREAST PROBLEM.....03<br>INSUFFICIENT MILK .....04<br>MOTHER WORKING/PLANNING TO WORK...05<br>CHILD REFUSED .....06<br>STARTED CONTRACEPTIVES.....07<br>WORRIED ABOUT HIV/AIDS.....08<br>DOCTOR'S ADVICE .....09<br>OTHER HEALTH PROVIDER'S ADVICE.....10<br>SPECIFY:<br>ADVICE OF FAMILY MEMBER/FRIENDS .....11<br>OTHER, SPECIFY: .....12<br>DON'T KNOW .....98<br>NO RESPONSE .....99 |                                                                                                                      |
| Q207                                                               | <i>Did you or the mother receive assistance to start breastfeeding?</i>                                                                                                     | YES.....01<br>NO.....00                                                                                                                                                                                                                                                                                                                                                                                                                            | →210                                                                                                                 |

| Q208                                  | <i>By who?</i><br><br><b>CIRCLE YES FOR ANY PERSON WHO PROVIDED ASSISTANCE</b>                                                                                                                                                              | <table style="width: 100%; border-collapse: collapse;"> <thead> <tr> <th colspan="2"></th> <th colspan="2" style="text-align: center;">Y= YES, N=NO</th> </tr> <tr> <th colspan="2"></th> <th style="text-align: center;">Y</th> <th style="text-align: center;">N</th> </tr> </thead> <tbody> <tr> <td>NURSE/MIDWIFE.....</td> <td>1</td> <td style="text-align: center;">0</td> <td></td> </tr> <tr> <td>NUTRITION COUNSELOR.....</td> <td>1</td> <td style="text-align: center;">0</td> <td></td> </tr> <tr> <td>DOCTOR.....</td> <td>1</td> <td style="text-align: center;">0</td> <td></td> </tr> <tr> <td>FAMILY MEMBER.....</td> <td>1</td> <td style="text-align: center;">0</td> <td></td> </tr> <tr> <td>PEER EDUCATOR.....</td> <td>1</td> <td style="text-align: center;">0</td> <td></td> </tr> <tr> <td>HUSBAND.....</td> <td>1</td> <td style="text-align: center;">0</td> <td></td> </tr> <tr> <td>OTHER, SPECIFY .....</td> <td>1</td> <td style="text-align: center;">0</td> <td></td> </tr> </tbody> </table>                                                                                                                                                                                                                                                                                                                                                                                                                                                                                                                                                                                                                                                                                                                                                                                                                                                                                                                                                                                                                                                                                                                                                                                                                                                                                                                                                                                                                                                                                                                                                                                                        |           |    | Y= YES, N=NO  |    |                 |    | Y | N | NURSE/MIDWIFE.....              | 1 | 0 |  | NUTRITION COUNSELOR.....         | 1 | 0 |  | DOCTOR.....               | 1 | 0 |  | FAMILY MEMBER.....                | 1 | 0 |  | PEER EDUCATOR..... | 1 | 0 |  | HUSBAND.....        | 1 | 0 |  | OTHER, SPECIFY ..... | 1 | 0 |  |             |   |   |  |                                 |   |   |  |                 |   |   |  |                              |   |   |  |                                 |   |   |  |                |   |   |  |                        |   |   |  |                                      |   |   |  |              |   |   |  |                |   |   |  |                    |   |   |  |                |   |   |  |             |   |   |  |              |   |   |  |                                       |   |   |  |  |
|---------------------------------------|---------------------------------------------------------------------------------------------------------------------------------------------------------------------------------------------------------------------------------------------|-----------------------------------------------------------------------------------------------------------------------------------------------------------------------------------------------------------------------------------------------------------------------------------------------------------------------------------------------------------------------------------------------------------------------------------------------------------------------------------------------------------------------------------------------------------------------------------------------------------------------------------------------------------------------------------------------------------------------------------------------------------------------------------------------------------------------------------------------------------------------------------------------------------------------------------------------------------------------------------------------------------------------------------------------------------------------------------------------------------------------------------------------------------------------------------------------------------------------------------------------------------------------------------------------------------------------------------------------------------------------------------------------------------------------------------------------------------------------------------------------------------------------------------------------------------------------------------------------------------------------------------------------------------------------------------------------------------------------------------------------------------------------------------------------------------------------------------------------------------------------------------------------------------------------------------------------------------------------------------------------------------------------------------------------------------------------------------------------------------------------------------------------------------------------------------------------------------------------------------------------------------------------------------------------------------------------------------------------------------------------------------------------------------------------------------------------------------------------------------------------------------------------------------------------------------------------------------------------------------------------------------------|-----------|----|---------------|----|-----------------|----|---|---|---------------------------------|---|---|--|----------------------------------|---|---|--|---------------------------|---|---|--|-----------------------------------|---|---|--|--------------------|---|---|--|---------------------|---|---|--|----------------------|---|---|--|-------------|---|---|--|---------------------------------|---|---|--|-----------------|---|---|--|------------------------------|---|---|--|---------------------------------|---|---|--|----------------|---|---|--|------------------------|---|---|--|--------------------------------------|---|---|--|--------------|---|---|--|----------------|---|---|--|--------------------|---|---|--|----------------|---|---|--|-------------|---|---|--|--------------|---|---|--|---------------------------------------|---|---|--|--|
|                                       |                                                                                                                                                                                                                                             | Y= YES, N=NO                                                                                                                                                                                                                                                                                                                                                                                                                                                                                                                                                                                                                                                                                                                                                                                                                                                                                                                                                                                                                                                                                                                                                                                                                                                                                                                                                                                                                                                                                                                                                                                                                                                                                                                                                                                                                                                                                                                                                                                                                                                                                                                                                                                                                                                                                                                                                                                                                                                                                                                                                                                                                            |           |    |               |    |                 |    |   |   |                                 |   |   |  |                                  |   |   |  |                           |   |   |  |                                   |   |   |  |                    |   |   |  |                     |   |   |  |                      |   |   |  |             |   |   |  |                                 |   |   |  |                 |   |   |  |                              |   |   |  |                                 |   |   |  |                |   |   |  |                        |   |   |  |                                      |   |   |  |              |   |   |  |                |   |   |  |                    |   |   |  |                |   |   |  |             |   |   |  |              |   |   |  |                                       |   |   |  |  |
|                                       |                                                                                                                                                                                                                                             | Y                                                                                                                                                                                                                                                                                                                                                                                                                                                                                                                                                                                                                                                                                                                                                                                                                                                                                                                                                                                                                                                                                                                                                                                                                                                                                                                                                                                                                                                                                                                                                                                                                                                                                                                                                                                                                                                                                                                                                                                                                                                                                                                                                                                                                                                                                                                                                                                                                                                                                                                                                                                                                                       | N         |    |               |    |                 |    |   |   |                                 |   |   |  |                                  |   |   |  |                           |   |   |  |                                   |   |   |  |                    |   |   |  |                     |   |   |  |                      |   |   |  |             |   |   |  |                                 |   |   |  |                 |   |   |  |                              |   |   |  |                                 |   |   |  |                |   |   |  |                        |   |   |  |                                      |   |   |  |              |   |   |  |                |   |   |  |                    |   |   |  |                |   |   |  |             |   |   |  |              |   |   |  |                                       |   |   |  |  |
| NURSE/MIDWIFE.....                    | 1                                                                                                                                                                                                                                           | 0                                                                                                                                                                                                                                                                                                                                                                                                                                                                                                                                                                                                                                                                                                                                                                                                                                                                                                                                                                                                                                                                                                                                                                                                                                                                                                                                                                                                                                                                                                                                                                                                                                                                                                                                                                                                                                                                                                                                                                                                                                                                                                                                                                                                                                                                                                                                                                                                                                                                                                                                                                                                                                       |           |    |               |    |                 |    |   |   |                                 |   |   |  |                                  |   |   |  |                           |   |   |  |                                   |   |   |  |                    |   |   |  |                     |   |   |  |                      |   |   |  |             |   |   |  |                                 |   |   |  |                 |   |   |  |                              |   |   |  |                                 |   |   |  |                |   |   |  |                        |   |   |  |                                      |   |   |  |              |   |   |  |                |   |   |  |                    |   |   |  |                |   |   |  |             |   |   |  |              |   |   |  |                                       |   |   |  |  |
| NUTRITION COUNSELOR.....              | 1                                                                                                                                                                                                                                           | 0                                                                                                                                                                                                                                                                                                                                                                                                                                                                                                                                                                                                                                                                                                                                                                                                                                                                                                                                                                                                                                                                                                                                                                                                                                                                                                                                                                                                                                                                                                                                                                                                                                                                                                                                                                                                                                                                                                                                                                                                                                                                                                                                                                                                                                                                                                                                                                                                                                                                                                                                                                                                                                       |           |    |               |    |                 |    |   |   |                                 |   |   |  |                                  |   |   |  |                           |   |   |  |                                   |   |   |  |                    |   |   |  |                     |   |   |  |                      |   |   |  |             |   |   |  |                                 |   |   |  |                 |   |   |  |                              |   |   |  |                                 |   |   |  |                |   |   |  |                        |   |   |  |                                      |   |   |  |              |   |   |  |                |   |   |  |                    |   |   |  |                |   |   |  |             |   |   |  |              |   |   |  |                                       |   |   |  |  |
| DOCTOR.....                           | 1                                                                                                                                                                                                                                           | 0                                                                                                                                                                                                                                                                                                                                                                                                                                                                                                                                                                                                                                                                                                                                                                                                                                                                                                                                                                                                                                                                                                                                                                                                                                                                                                                                                                                                                                                                                                                                                                                                                                                                                                                                                                                                                                                                                                                                                                                                                                                                                                                                                                                                                                                                                                                                                                                                                                                                                                                                                                                                                                       |           |    |               |    |                 |    |   |   |                                 |   |   |  |                                  |   |   |  |                           |   |   |  |                                   |   |   |  |                    |   |   |  |                     |   |   |  |                      |   |   |  |             |   |   |  |                                 |   |   |  |                 |   |   |  |                              |   |   |  |                                 |   |   |  |                |   |   |  |                        |   |   |  |                                      |   |   |  |              |   |   |  |                |   |   |  |                    |   |   |  |                |   |   |  |             |   |   |  |              |   |   |  |                                       |   |   |  |  |
| FAMILY MEMBER.....                    | 1                                                                                                                                                                                                                                           | 0                                                                                                                                                                                                                                                                                                                                                                                                                                                                                                                                                                                                                                                                                                                                                                                                                                                                                                                                                                                                                                                                                                                                                                                                                                                                                                                                                                                                                                                                                                                                                                                                                                                                                                                                                                                                                                                                                                                                                                                                                                                                                                                                                                                                                                                                                                                                                                                                                                                                                                                                                                                                                                       |           |    |               |    |                 |    |   |   |                                 |   |   |  |                                  |   |   |  |                           |   |   |  |                                   |   |   |  |                    |   |   |  |                     |   |   |  |                      |   |   |  |             |   |   |  |                                 |   |   |  |                 |   |   |  |                              |   |   |  |                                 |   |   |  |                |   |   |  |                        |   |   |  |                                      |   |   |  |              |   |   |  |                |   |   |  |                    |   |   |  |                |   |   |  |             |   |   |  |              |   |   |  |                                       |   |   |  |  |
| PEER EDUCATOR.....                    | 1                                                                                                                                                                                                                                           | 0                                                                                                                                                                                                                                                                                                                                                                                                                                                                                                                                                                                                                                                                                                                                                                                                                                                                                                                                                                                                                                                                                                                                                                                                                                                                                                                                                                                                                                                                                                                                                                                                                                                                                                                                                                                                                                                                                                                                                                                                                                                                                                                                                                                                                                                                                                                                                                                                                                                                                                                                                                                                                                       |           |    |               |    |                 |    |   |   |                                 |   |   |  |                                  |   |   |  |                           |   |   |  |                                   |   |   |  |                    |   |   |  |                     |   |   |  |                      |   |   |  |             |   |   |  |                                 |   |   |  |                 |   |   |  |                              |   |   |  |                                 |   |   |  |                |   |   |  |                        |   |   |  |                                      |   |   |  |              |   |   |  |                |   |   |  |                    |   |   |  |                |   |   |  |             |   |   |  |              |   |   |  |                                       |   |   |  |  |
| HUSBAND.....                          | 1                                                                                                                                                                                                                                           | 0                                                                                                                                                                                                                                                                                                                                                                                                                                                                                                                                                                                                                                                                                                                                                                                                                                                                                                                                                                                                                                                                                                                                                                                                                                                                                                                                                                                                                                                                                                                                                                                                                                                                                                                                                                                                                                                                                                                                                                                                                                                                                                                                                                                                                                                                                                                                                                                                                                                                                                                                                                                                                                       |           |    |               |    |                 |    |   |   |                                 |   |   |  |                                  |   |   |  |                           |   |   |  |                                   |   |   |  |                    |   |   |  |                     |   |   |  |                      |   |   |  |             |   |   |  |                                 |   |   |  |                 |   |   |  |                              |   |   |  |                                 |   |   |  |                |   |   |  |                        |   |   |  |                                      |   |   |  |              |   |   |  |                |   |   |  |                    |   |   |  |                |   |   |  |             |   |   |  |              |   |   |  |                                       |   |   |  |  |
| OTHER, SPECIFY .....                  | 1                                                                                                                                                                                                                                           | 0                                                                                                                                                                                                                                                                                                                                                                                                                                                                                                                                                                                                                                                                                                                                                                                                                                                                                                                                                                                                                                                                                                                                                                                                                                                                                                                                                                                                                                                                                                                                                                                                                                                                                                                                                                                                                                                                                                                                                                                                                                                                                                                                                                                                                                                                                                                                                                                                                                                                                                                                                                                                                                       |           |    |               |    |                 |    |   |   |                                 |   |   |  |                                  |   |   |  |                           |   |   |  |                                   |   |   |  |                    |   |   |  |                     |   |   |  |                      |   |   |  |             |   |   |  |                                 |   |   |  |                 |   |   |  |                              |   |   |  |                                 |   |   |  |                |   |   |  |                        |   |   |  |                                      |   |   |  |              |   |   |  |                |   |   |  |                    |   |   |  |                |   |   |  |             |   |   |  |              |   |   |  |                                       |   |   |  |  |
| Q209                                  | <i>What information did they provide?</i><br><br><b>CIRCLE YES FOR ANY TYPE OF INFORMATION PROVIDED</b>                                                                                                                                     | <table style="width: 100%; border-collapse: collapse;"> <thead> <tr> <th colspan="2"></th> <th colspan="2" style="text-align: center;">Y= YES, N=NO</th> </tr> <tr> <th colspan="2"></th> <th style="text-align: center;">Y</th> <th style="text-align: center;">N</th> </tr> </thead> <tbody> <tr> <td>ATTACHMENT TO BREAST.....</td> <td>1</td> <td style="text-align: center;">0</td> <td></td> </tr> <tr> <td>HOW TO STIMULATE BREASTMILK.....</td> <td>1</td> <td style="text-align: center;">0</td> <td></td> </tr> <tr> <td>WHAT TO EAT OR DRINK.....</td> <td>1</td> <td style="text-align: center;">0</td> <td></td> </tr> <tr> <td>OTHER, SPECIFY .....</td> <td>1</td> <td style="text-align: center;">0</td> <td></td> </tr> </tbody> </table>                                                                                                                                                                                                                                                                                                                                                                                                                                                                                                                                                                                                                                                                                                                                                                                                                                                                                                                                                                                                                                                                                                                                                                                                                                                                                                                                                                                                                                                                                                                                                                                                                                                                                                                                                                                                                                                                              |           |    | Y= YES, N=NO  |    |                 |    | Y | N | ATTACHMENT TO BREAST.....       | 1 | 0 |  | HOW TO STIMULATE BREASTMILK..... | 1 | 0 |  | WHAT TO EAT OR DRINK..... | 1 | 0 |  | OTHER, SPECIFY .....              | 1 | 0 |  |                    |   |   |  |                     |   |   |  |                      |   |   |  |             |   |   |  |                                 |   |   |  |                 |   |   |  |                              |   |   |  |                                 |   |   |  |                |   |   |  |                        |   |   |  |                                      |   |   |  |              |   |   |  |                |   |   |  |                    |   |   |  |                |   |   |  |             |   |   |  |              |   |   |  |                                       |   |   |  |  |
|                                       |                                                                                                                                                                                                                                             | Y= YES, N=NO                                                                                                                                                                                                                                                                                                                                                                                                                                                                                                                                                                                                                                                                                                                                                                                                                                                                                                                                                                                                                                                                                                                                                                                                                                                                                                                                                                                                                                                                                                                                                                                                                                                                                                                                                                                                                                                                                                                                                                                                                                                                                                                                                                                                                                                                                                                                                                                                                                                                                                                                                                                                                            |           |    |               |    |                 |    |   |   |                                 |   |   |  |                                  |   |   |  |                           |   |   |  |                                   |   |   |  |                    |   |   |  |                     |   |   |  |                      |   |   |  |             |   |   |  |                                 |   |   |  |                 |   |   |  |                              |   |   |  |                                 |   |   |  |                |   |   |  |                        |   |   |  |                                      |   |   |  |              |   |   |  |                |   |   |  |                    |   |   |  |                |   |   |  |             |   |   |  |              |   |   |  |                                       |   |   |  |  |
|                                       |                                                                                                                                                                                                                                             | Y                                                                                                                                                                                                                                                                                                                                                                                                                                                                                                                                                                                                                                                                                                                                                                                                                                                                                                                                                                                                                                                                                                                                                                                                                                                                                                                                                                                                                                                                                                                                                                                                                                                                                                                                                                                                                                                                                                                                                                                                                                                                                                                                                                                                                                                                                                                                                                                                                                                                                                                                                                                                                                       | N         |    |               |    |                 |    |   |   |                                 |   |   |  |                                  |   |   |  |                           |   |   |  |                                   |   |   |  |                    |   |   |  |                     |   |   |  |                      |   |   |  |             |   |   |  |                                 |   |   |  |                 |   |   |  |                              |   |   |  |                                 |   |   |  |                |   |   |  |                        |   |   |  |                                      |   |   |  |              |   |   |  |                |   |   |  |                    |   |   |  |                |   |   |  |             |   |   |  |              |   |   |  |                                       |   |   |  |  |
| ATTACHMENT TO BREAST.....             | 1                                                                                                                                                                                                                                           | 0                                                                                                                                                                                                                                                                                                                                                                                                                                                                                                                                                                                                                                                                                                                                                                                                                                                                                                                                                                                                                                                                                                                                                                                                                                                                                                                                                                                                                                                                                                                                                                                                                                                                                                                                                                                                                                                                                                                                                                                                                                                                                                                                                                                                                                                                                                                                                                                                                                                                                                                                                                                                                                       |           |    |               |    |                 |    |   |   |                                 |   |   |  |                                  |   |   |  |                           |   |   |  |                                   |   |   |  |                    |   |   |  |                     |   |   |  |                      |   |   |  |             |   |   |  |                                 |   |   |  |                 |   |   |  |                              |   |   |  |                                 |   |   |  |                |   |   |  |                        |   |   |  |                                      |   |   |  |              |   |   |  |                |   |   |  |                    |   |   |  |                |   |   |  |             |   |   |  |              |   |   |  |                                       |   |   |  |  |
| HOW TO STIMULATE BREASTMILK.....      | 1                                                                                                                                                                                                                                           | 0                                                                                                                                                                                                                                                                                                                                                                                                                                                                                                                                                                                                                                                                                                                                                                                                                                                                                                                                                                                                                                                                                                                                                                                                                                                                                                                                                                                                                                                                                                                                                                                                                                                                                                                                                                                                                                                                                                                                                                                                                                                                                                                                                                                                                                                                                                                                                                                                                                                                                                                                                                                                                                       |           |    |               |    |                 |    |   |   |                                 |   |   |  |                                  |   |   |  |                           |   |   |  |                                   |   |   |  |                    |   |   |  |                     |   |   |  |                      |   |   |  |             |   |   |  |                                 |   |   |  |                 |   |   |  |                              |   |   |  |                                 |   |   |  |                |   |   |  |                        |   |   |  |                                      |   |   |  |              |   |   |  |                |   |   |  |                    |   |   |  |                |   |   |  |             |   |   |  |              |   |   |  |                                       |   |   |  |  |
| WHAT TO EAT OR DRINK.....             | 1                                                                                                                                                                                                                                           | 0                                                                                                                                                                                                                                                                                                                                                                                                                                                                                                                                                                                                                                                                                                                                                                                                                                                                                                                                                                                                                                                                                                                                                                                                                                                                                                                                                                                                                                                                                                                                                                                                                                                                                                                                                                                                                                                                                                                                                                                                                                                                                                                                                                                                                                                                                                                                                                                                                                                                                                                                                                                                                                       |           |    |               |    |                 |    |   |   |                                 |   |   |  |                                  |   |   |  |                           |   |   |  |                                   |   |   |  |                    |   |   |  |                     |   |   |  |                      |   |   |  |             |   |   |  |                                 |   |   |  |                 |   |   |  |                              |   |   |  |                                 |   |   |  |                |   |   |  |                        |   |   |  |                                      |   |   |  |              |   |   |  |                |   |   |  |                    |   |   |  |                |   |   |  |             |   |   |  |              |   |   |  |                                       |   |   |  |  |
| OTHER, SPECIFY .....                  | 1                                                                                                                                                                                                                                           | 0                                                                                                                                                                                                                                                                                                                                                                                                                                                                                                                                                                                                                                                                                                                                                                                                                                                                                                                                                                                                                                                                                                                                                                                                                                                                                                                                                                                                                                                                                                                                                                                                                                                                                                                                                                                                                                                                                                                                                                                                                                                                                                                                                                                                                                                                                                                                                                                                                                                                                                                                                                                                                                       |           |    |               |    |                 |    |   |   |                                 |   |   |  |                                  |   |   |  |                           |   |   |  |                                   |   |   |  |                    |   |   |  |                     |   |   |  |                      |   |   |  |             |   |   |  |                                 |   |   |  |                 |   |   |  |                              |   |   |  |                                 |   |   |  |                |   |   |  |                        |   |   |  |                                      |   |   |  |              |   |   |  |                |   |   |  |                    |   |   |  |                |   |   |  |             |   |   |  |              |   |   |  |                                       |   |   |  |  |
| Q210                                  | <i>Since yesterday has [NAME] received breast milk from the mother or any other person?</i>                                                                                                                                                 | <table style="width: 100%; border-collapse: collapse;"> <tbody> <tr> <td>YES .....</td> <td>01</td> </tr> <tr> <td>NO.....</td> <td>00</td> </tr> <tr> <td>DON'T KNOW.....</td> <td>98</td> </tr> </tbody> </table>                                                                                                                                                                                                                                                                                                                                                                                                                                                                                                                                                                                                                                                                                                                                                                                                                                                                                                                                                                                                                                                                                                                                                                                                                                                                                                                                                                                                                                                                                                                                                                                                                                                                                                                                                                                                                                                                                                                                                                                                                                                                                                                                                                                                                                                                                                                                                                                                                     | YES ..... | 01 | NO.....       | 00 | DON'T KNOW..... | 98 |   |   |                                 |   |   |  |                                  |   |   |  |                           |   |   |  |                                   |   |   |  |                    |   |   |  |                     |   |   |  |                      |   |   |  |             |   |   |  |                                 |   |   |  |                 |   |   |  |                              |   |   |  |                                 |   |   |  |                |   |   |  |                        |   |   |  |                                      |   |   |  |              |   |   |  |                |   |   |  |                    |   |   |  |                |   |   |  |             |   |   |  |              |   |   |  |                                       |   |   |  |  |
| YES .....                             | 01                                                                                                                                                                                                                                          |                                                                                                                                                                                                                                                                                                                                                                                                                                                                                                                                                                                                                                                                                                                                                                                                                                                                                                                                                                                                                                                                                                                                                                                                                                                                                                                                                                                                                                                                                                                                                                                                                                                                                                                                                                                                                                                                                                                                                                                                                                                                                                                                                                                                                                                                                                                                                                                                                                                                                                                                                                                                                                         |           |    |               |    |                 |    |   |   |                                 |   |   |  |                                  |   |   |  |                           |   |   |  |                                   |   |   |  |                    |   |   |  |                     |   |   |  |                      |   |   |  |             |   |   |  |                                 |   |   |  |                 |   |   |  |                              |   |   |  |                                 |   |   |  |                |   |   |  |                        |   |   |  |                                      |   |   |  |              |   |   |  |                |   |   |  |                    |   |   |  |                |   |   |  |             |   |   |  |              |   |   |  |                                       |   |   |  |  |
| NO.....                               | 00                                                                                                                                                                                                                                          |                                                                                                                                                                                                                                                                                                                                                                                                                                                                                                                                                                                                                                                                                                                                                                                                                                                                                                                                                                                                                                                                                                                                                                                                                                                                                                                                                                                                                                                                                                                                                                                                                                                                                                                                                                                                                                                                                                                                                                                                                                                                                                                                                                                                                                                                                                                                                                                                                                                                                                                                                                                                                                         |           |    |               |    |                 |    |   |   |                                 |   |   |  |                                  |   |   |  |                           |   |   |  |                                   |   |   |  |                    |   |   |  |                     |   |   |  |                      |   |   |  |             |   |   |  |                                 |   |   |  |                 |   |   |  |                              |   |   |  |                                 |   |   |  |                |   |   |  |                        |   |   |  |                                      |   |   |  |              |   |   |  |                |   |   |  |                    |   |   |  |                |   |   |  |             |   |   |  |              |   |   |  |                                       |   |   |  |  |
| DON'T KNOW.....                       | 98                                                                                                                                                                                                                                          |                                                                                                                                                                                                                                                                                                                                                                                                                                                                                                                                                                                                                                                                                                                                                                                                                                                                                                                                                                                                                                                                                                                                                                                                                                                                                                                                                                                                                                                                                                                                                                                                                                                                                                                                                                                                                                                                                                                                                                                                                                                                                                                                                                                                                                                                                                                                                                                                                                                                                                                                                                                                                                         |           |    |               |    |                 |    |   |   |                                 |   |   |  |                                  |   |   |  |                           |   |   |  |                                   |   |   |  |                    |   |   |  |                     |   |   |  |                      |   |   |  |             |   |   |  |                                 |   |   |  |                 |   |   |  |                              |   |   |  |                                 |   |   |  |                |   |   |  |                        |   |   |  |                                      |   |   |  |              |   |   |  |                |   |   |  |                    |   |   |  |                |   |   |  |             |   |   |  |              |   |   |  |                                       |   |   |  |  |
| Q211                                  | <i>Since yesterday has [NAME] received any of these things?</i><br><br><b>INTERVIEWER SHOULD ASK ABOUT EACH OPTION AND RECORD THE ANSWER. AFTER ASKING ALL OPTIONS, THEN ASK "DID THE BABY EAT ANYTHING ELSE DURING THE PAST 24 HOURS?"</b> | <table style="width: 100%; border-collapse: collapse;"> <thead> <tr> <th colspan="2"></th> <th colspan="2" style="text-align: center;">(Y=YES, N=NO)</th> </tr> <tr> <th colspan="2"></th> <th style="text-align: center;">Y</th> <th style="text-align: center;">N</th> </tr> </thead> <tbody> <tr> <td>A. VITAMIN DROPS/MEDICINE .....</td> <td>1</td> <td style="text-align: center;">0</td> <td></td> </tr> <tr> <td>B. ORS.....</td> <td>1</td> <td style="text-align: center;">0</td> <td></td> </tr> <tr> <td>C. PLAIN WATER.....</td> <td>1</td> <td style="text-align: center;">0</td> <td></td> </tr> <tr> <td>D. SUGAR WATER/ SWEET DRINKS.....</td> <td>1</td> <td style="text-align: center;">0</td> <td></td> </tr> <tr> <td>E. PALM WINE.....</td> <td>1</td> <td style="text-align: center;">0</td> <td></td> </tr> <tr> <td>F. FRUIT JUICE.....</td> <td>1</td> <td style="text-align: center;">0</td> <td></td> </tr> <tr> <td>G. TEA .....</td> <td>1</td> <td style="text-align: center;">0</td> <td></td> </tr> <tr> <td>H. PAP.....</td> <td>1</td> <td style="text-align: center;">0</td> <td></td> </tr> <tr> <td>I. INFANT FORMULA (GUIGOZ).....</td> <td>1</td> <td style="text-align: center;">0</td> <td></td> </tr> <tr> <td>J. CERELAC.....</td> <td>1</td> <td style="text-align: center;">0</td> <td></td> </tr> <tr> <td>K. FRESH MILK FROM COWS.....</td> <td>1</td> <td style="text-align: center;">0</td> <td></td> </tr> <tr> <td>L. LIQUID OR POWDERED MILK.....</td> <td>1</td> <td style="text-align: center;">0</td> <td></td> </tr> <tr> <td>M. YOGURT.....</td> <td>1</td> <td style="text-align: center;">0</td> <td></td> </tr> <tr> <td>N. CUSTARD POWDER.....</td> <td>1</td> <td style="text-align: center;">0</td> <td></td> </tr> <tr> <td>O. COOKED, MASHED FOODS. (FUFU).....</td> <td>1</td> <td style="text-align: center;">0</td> <td></td> </tr> <tr> <td>P. RICE.....</td> <td>1</td> <td style="text-align: center;">0</td> <td></td> </tr> <tr> <td>Q. FRUITS.....</td> <td>1</td> <td style="text-align: center;">0</td> <td></td> </tr> <tr> <td>R. VEGETABLES.....</td> <td>1</td> <td style="text-align: center;">0</td> <td></td> </tr> <tr> <td>S. BEANS .....</td> <td>1</td> <td style="text-align: center;">0</td> <td></td> </tr> <tr> <td>T. EGG.....</td> <td>1</td> <td style="text-align: center;">0</td> <td></td> </tr> <tr> <td>U. STEW.....</td> <td>1</td> <td style="text-align: center;">0</td> <td></td> </tr> <tr> <td>V. OTHER LIQUIDS OR FOODS, SPECIFY ..</td> <td>1</td> <td style="text-align: center;">0</td> <td></td> </tr> </tbody> </table> |           |    | (Y=YES, N=NO) |    |                 |    | Y | N | A. VITAMIN DROPS/MEDICINE ..... | 1 | 0 |  | B. ORS.....                      | 1 | 0 |  | C. PLAIN WATER.....       | 1 | 0 |  | D. SUGAR WATER/ SWEET DRINKS..... | 1 | 0 |  | E. PALM WINE.....  | 1 | 0 |  | F. FRUIT JUICE..... | 1 | 0 |  | G. TEA .....         | 1 | 0 |  | H. PAP..... | 1 | 0 |  | I. INFANT FORMULA (GUIGOZ)..... | 1 | 0 |  | J. CERELAC..... | 1 | 0 |  | K. FRESH MILK FROM COWS..... | 1 | 0 |  | L. LIQUID OR POWDERED MILK..... | 1 | 0 |  | M. YOGURT..... | 1 | 0 |  | N. CUSTARD POWDER..... | 1 | 0 |  | O. COOKED, MASHED FOODS. (FUFU)..... | 1 | 0 |  | P. RICE..... | 1 | 0 |  | Q. FRUITS..... | 1 | 0 |  | R. VEGETABLES..... | 1 | 0 |  | S. BEANS ..... | 1 | 0 |  | T. EGG..... | 1 | 0 |  | U. STEW..... | 1 | 0 |  | V. OTHER LIQUIDS OR FOODS, SPECIFY .. | 1 | 0 |  |  |
|                                       |                                                                                                                                                                                                                                             | (Y=YES, N=NO)                                                                                                                                                                                                                                                                                                                                                                                                                                                                                                                                                                                                                                                                                                                                                                                                                                                                                                                                                                                                                                                                                                                                                                                                                                                                                                                                                                                                                                                                                                                                                                                                                                                                                                                                                                                                                                                                                                                                                                                                                                                                                                                                                                                                                                                                                                                                                                                                                                                                                                                                                                                                                           |           |    |               |    |                 |    |   |   |                                 |   |   |  |                                  |   |   |  |                           |   |   |  |                                   |   |   |  |                    |   |   |  |                     |   |   |  |                      |   |   |  |             |   |   |  |                                 |   |   |  |                 |   |   |  |                              |   |   |  |                                 |   |   |  |                |   |   |  |                        |   |   |  |                                      |   |   |  |              |   |   |  |                |   |   |  |                    |   |   |  |                |   |   |  |             |   |   |  |              |   |   |  |                                       |   |   |  |  |
|                                       |                                                                                                                                                                                                                                             | Y                                                                                                                                                                                                                                                                                                                                                                                                                                                                                                                                                                                                                                                                                                                                                                                                                                                                                                                                                                                                                                                                                                                                                                                                                                                                                                                                                                                                                                                                                                                                                                                                                                                                                                                                                                                                                                                                                                                                                                                                                                                                                                                                                                                                                                                                                                                                                                                                                                                                                                                                                                                                                                       | N         |    |               |    |                 |    |   |   |                                 |   |   |  |                                  |   |   |  |                           |   |   |  |                                   |   |   |  |                    |   |   |  |                     |   |   |  |                      |   |   |  |             |   |   |  |                                 |   |   |  |                 |   |   |  |                              |   |   |  |                                 |   |   |  |                |   |   |  |                        |   |   |  |                                      |   |   |  |              |   |   |  |                |   |   |  |                    |   |   |  |                |   |   |  |             |   |   |  |              |   |   |  |                                       |   |   |  |  |
| A. VITAMIN DROPS/MEDICINE .....       | 1                                                                                                                                                                                                                                           | 0                                                                                                                                                                                                                                                                                                                                                                                                                                                                                                                                                                                                                                                                                                                                                                                                                                                                                                                                                                                                                                                                                                                                                                                                                                                                                                                                                                                                                                                                                                                                                                                                                                                                                                                                                                                                                                                                                                                                                                                                                                                                                                                                                                                                                                                                                                                                                                                                                                                                                                                                                                                                                                       |           |    |               |    |                 |    |   |   |                                 |   |   |  |                                  |   |   |  |                           |   |   |  |                                   |   |   |  |                    |   |   |  |                     |   |   |  |                      |   |   |  |             |   |   |  |                                 |   |   |  |                 |   |   |  |                              |   |   |  |                                 |   |   |  |                |   |   |  |                        |   |   |  |                                      |   |   |  |              |   |   |  |                |   |   |  |                    |   |   |  |                |   |   |  |             |   |   |  |              |   |   |  |                                       |   |   |  |  |
| B. ORS.....                           | 1                                                                                                                                                                                                                                           | 0                                                                                                                                                                                                                                                                                                                                                                                                                                                                                                                                                                                                                                                                                                                                                                                                                                                                                                                                                                                                                                                                                                                                                                                                                                                                                                                                                                                                                                                                                                                                                                                                                                                                                                                                                                                                                                                                                                                                                                                                                                                                                                                                                                                                                                                                                                                                                                                                                                                                                                                                                                                                                                       |           |    |               |    |                 |    |   |   |                                 |   |   |  |                                  |   |   |  |                           |   |   |  |                                   |   |   |  |                    |   |   |  |                     |   |   |  |                      |   |   |  |             |   |   |  |                                 |   |   |  |                 |   |   |  |                              |   |   |  |                                 |   |   |  |                |   |   |  |                        |   |   |  |                                      |   |   |  |              |   |   |  |                |   |   |  |                    |   |   |  |                |   |   |  |             |   |   |  |              |   |   |  |                                       |   |   |  |  |
| C. PLAIN WATER.....                   | 1                                                                                                                                                                                                                                           | 0                                                                                                                                                                                                                                                                                                                                                                                                                                                                                                                                                                                                                                                                                                                                                                                                                                                                                                                                                                                                                                                                                                                                                                                                                                                                                                                                                                                                                                                                                                                                                                                                                                                                                                                                                                                                                                                                                                                                                                                                                                                                                                                                                                                                                                                                                                                                                                                                                                                                                                                                                                                                                                       |           |    |               |    |                 |    |   |   |                                 |   |   |  |                                  |   |   |  |                           |   |   |  |                                   |   |   |  |                    |   |   |  |                     |   |   |  |                      |   |   |  |             |   |   |  |                                 |   |   |  |                 |   |   |  |                              |   |   |  |                                 |   |   |  |                |   |   |  |                        |   |   |  |                                      |   |   |  |              |   |   |  |                |   |   |  |                    |   |   |  |                |   |   |  |             |   |   |  |              |   |   |  |                                       |   |   |  |  |
| D. SUGAR WATER/ SWEET DRINKS.....     | 1                                                                                                                                                                                                                                           | 0                                                                                                                                                                                                                                                                                                                                                                                                                                                                                                                                                                                                                                                                                                                                                                                                                                                                                                                                                                                                                                                                                                                                                                                                                                                                                                                                                                                                                                                                                                                                                                                                                                                                                                                                                                                                                                                                                                                                                                                                                                                                                                                                                                                                                                                                                                                                                                                                                                                                                                                                                                                                                                       |           |    |               |    |                 |    |   |   |                                 |   |   |  |                                  |   |   |  |                           |   |   |  |                                   |   |   |  |                    |   |   |  |                     |   |   |  |                      |   |   |  |             |   |   |  |                                 |   |   |  |                 |   |   |  |                              |   |   |  |                                 |   |   |  |                |   |   |  |                        |   |   |  |                                      |   |   |  |              |   |   |  |                |   |   |  |                    |   |   |  |                |   |   |  |             |   |   |  |              |   |   |  |                                       |   |   |  |  |
| E. PALM WINE.....                     | 1                                                                                                                                                                                                                                           | 0                                                                                                                                                                                                                                                                                                                                                                                                                                                                                                                                                                                                                                                                                                                                                                                                                                                                                                                                                                                                                                                                                                                                                                                                                                                                                                                                                                                                                                                                                                                                                                                                                                                                                                                                                                                                                                                                                                                                                                                                                                                                                                                                                                                                                                                                                                                                                                                                                                                                                                                                                                                                                                       |           |    |               |    |                 |    |   |   |                                 |   |   |  |                                  |   |   |  |                           |   |   |  |                                   |   |   |  |                    |   |   |  |                     |   |   |  |                      |   |   |  |             |   |   |  |                                 |   |   |  |                 |   |   |  |                              |   |   |  |                                 |   |   |  |                |   |   |  |                        |   |   |  |                                      |   |   |  |              |   |   |  |                |   |   |  |                    |   |   |  |                |   |   |  |             |   |   |  |              |   |   |  |                                       |   |   |  |  |
| F. FRUIT JUICE.....                   | 1                                                                                                                                                                                                                                           | 0                                                                                                                                                                                                                                                                                                                                                                                                                                                                                                                                                                                                                                                                                                                                                                                                                                                                                                                                                                                                                                                                                                                                                                                                                                                                                                                                                                                                                                                                                                                                                                                                                                                                                                                                                                                                                                                                                                                                                                                                                                                                                                                                                                                                                                                                                                                                                                                                                                                                                                                                                                                                                                       |           |    |               |    |                 |    |   |   |                                 |   |   |  |                                  |   |   |  |                           |   |   |  |                                   |   |   |  |                    |   |   |  |                     |   |   |  |                      |   |   |  |             |   |   |  |                                 |   |   |  |                 |   |   |  |                              |   |   |  |                                 |   |   |  |                |   |   |  |                        |   |   |  |                                      |   |   |  |              |   |   |  |                |   |   |  |                    |   |   |  |                |   |   |  |             |   |   |  |              |   |   |  |                                       |   |   |  |  |
| G. TEA .....                          | 1                                                                                                                                                                                                                                           | 0                                                                                                                                                                                                                                                                                                                                                                                                                                                                                                                                                                                                                                                                                                                                                                                                                                                                                                                                                                                                                                                                                                                                                                                                                                                                                                                                                                                                                                                                                                                                                                                                                                                                                                                                                                                                                                                                                                                                                                                                                                                                                                                                                                                                                                                                                                                                                                                                                                                                                                                                                                                                                                       |           |    |               |    |                 |    |   |   |                                 |   |   |  |                                  |   |   |  |                           |   |   |  |                                   |   |   |  |                    |   |   |  |                     |   |   |  |                      |   |   |  |             |   |   |  |                                 |   |   |  |                 |   |   |  |                              |   |   |  |                                 |   |   |  |                |   |   |  |                        |   |   |  |                                      |   |   |  |              |   |   |  |                |   |   |  |                    |   |   |  |                |   |   |  |             |   |   |  |              |   |   |  |                                       |   |   |  |  |
| H. PAP.....                           | 1                                                                                                                                                                                                                                           | 0                                                                                                                                                                                                                                                                                                                                                                                                                                                                                                                                                                                                                                                                                                                                                                                                                                                                                                                                                                                                                                                                                                                                                                                                                                                                                                                                                                                                                                                                                                                                                                                                                                                                                                                                                                                                                                                                                                                                                                                                                                                                                                                                                                                                                                                                                                                                                                                                                                                                                                                                                                                                                                       |           |    |               |    |                 |    |   |   |                                 |   |   |  |                                  |   |   |  |                           |   |   |  |                                   |   |   |  |                    |   |   |  |                     |   |   |  |                      |   |   |  |             |   |   |  |                                 |   |   |  |                 |   |   |  |                              |   |   |  |                                 |   |   |  |                |   |   |  |                        |   |   |  |                                      |   |   |  |              |   |   |  |                |   |   |  |                    |   |   |  |                |   |   |  |             |   |   |  |              |   |   |  |                                       |   |   |  |  |
| I. INFANT FORMULA (GUIGOZ).....       | 1                                                                                                                                                                                                                                           | 0                                                                                                                                                                                                                                                                                                                                                                                                                                                                                                                                                                                                                                                                                                                                                                                                                                                                                                                                                                                                                                                                                                                                                                                                                                                                                                                                                                                                                                                                                                                                                                                                                                                                                                                                                                                                                                                                                                                                                                                                                                                                                                                                                                                                                                                                                                                                                                                                                                                                                                                                                                                                                                       |           |    |               |    |                 |    |   |   |                                 |   |   |  |                                  |   |   |  |                           |   |   |  |                                   |   |   |  |                    |   |   |  |                     |   |   |  |                      |   |   |  |             |   |   |  |                                 |   |   |  |                 |   |   |  |                              |   |   |  |                                 |   |   |  |                |   |   |  |                        |   |   |  |                                      |   |   |  |              |   |   |  |                |   |   |  |                    |   |   |  |                |   |   |  |             |   |   |  |              |   |   |  |                                       |   |   |  |  |
| J. CERELAC.....                       | 1                                                                                                                                                                                                                                           | 0                                                                                                                                                                                                                                                                                                                                                                                                                                                                                                                                                                                                                                                                                                                                                                                                                                                                                                                                                                                                                                                                                                                                                                                                                                                                                                                                                                                                                                                                                                                                                                                                                                                                                                                                                                                                                                                                                                                                                                                                                                                                                                                                                                                                                                                                                                                                                                                                                                                                                                                                                                                                                                       |           |    |               |    |                 |    |   |   |                                 |   |   |  |                                  |   |   |  |                           |   |   |  |                                   |   |   |  |                    |   |   |  |                     |   |   |  |                      |   |   |  |             |   |   |  |                                 |   |   |  |                 |   |   |  |                              |   |   |  |                                 |   |   |  |                |   |   |  |                        |   |   |  |                                      |   |   |  |              |   |   |  |                |   |   |  |                    |   |   |  |                |   |   |  |             |   |   |  |              |   |   |  |                                       |   |   |  |  |
| K. FRESH MILK FROM COWS.....          | 1                                                                                                                                                                                                                                           | 0                                                                                                                                                                                                                                                                                                                                                                                                                                                                                                                                                                                                                                                                                                                                                                                                                                                                                                                                                                                                                                                                                                                                                                                                                                                                                                                                                                                                                                                                                                                                                                                                                                                                                                                                                                                                                                                                                                                                                                                                                                                                                                                                                                                                                                                                                                                                                                                                                                                                                                                                                                                                                                       |           |    |               |    |                 |    |   |   |                                 |   |   |  |                                  |   |   |  |                           |   |   |  |                                   |   |   |  |                    |   |   |  |                     |   |   |  |                      |   |   |  |             |   |   |  |                                 |   |   |  |                 |   |   |  |                              |   |   |  |                                 |   |   |  |                |   |   |  |                        |   |   |  |                                      |   |   |  |              |   |   |  |                |   |   |  |                    |   |   |  |                |   |   |  |             |   |   |  |              |   |   |  |                                       |   |   |  |  |
| L. LIQUID OR POWDERED MILK.....       | 1                                                                                                                                                                                                                                           | 0                                                                                                                                                                                                                                                                                                                                                                                                                                                                                                                                                                                                                                                                                                                                                                                                                                                                                                                                                                                                                                                                                                                                                                                                                                                                                                                                                                                                                                                                                                                                                                                                                                                                                                                                                                                                                                                                                                                                                                                                                                                                                                                                                                                                                                                                                                                                                                                                                                                                                                                                                                                                                                       |           |    |               |    |                 |    |   |   |                                 |   |   |  |                                  |   |   |  |                           |   |   |  |                                   |   |   |  |                    |   |   |  |                     |   |   |  |                      |   |   |  |             |   |   |  |                                 |   |   |  |                 |   |   |  |                              |   |   |  |                                 |   |   |  |                |   |   |  |                        |   |   |  |                                      |   |   |  |              |   |   |  |                |   |   |  |                    |   |   |  |                |   |   |  |             |   |   |  |              |   |   |  |                                       |   |   |  |  |
| M. YOGURT.....                        | 1                                                                                                                                                                                                                                           | 0                                                                                                                                                                                                                                                                                                                                                                                                                                                                                                                                                                                                                                                                                                                                                                                                                                                                                                                                                                                                                                                                                                                                                                                                                                                                                                                                                                                                                                                                                                                                                                                                                                                                                                                                                                                                                                                                                                                                                                                                                                                                                                                                                                                                                                                                                                                                                                                                                                                                                                                                                                                                                                       |           |    |               |    |                 |    |   |   |                                 |   |   |  |                                  |   |   |  |                           |   |   |  |                                   |   |   |  |                    |   |   |  |                     |   |   |  |                      |   |   |  |             |   |   |  |                                 |   |   |  |                 |   |   |  |                              |   |   |  |                                 |   |   |  |                |   |   |  |                        |   |   |  |                                      |   |   |  |              |   |   |  |                |   |   |  |                    |   |   |  |                |   |   |  |             |   |   |  |              |   |   |  |                                       |   |   |  |  |
| N. CUSTARD POWDER.....                | 1                                                                                                                                                                                                                                           | 0                                                                                                                                                                                                                                                                                                                                                                                                                                                                                                                                                                                                                                                                                                                                                                                                                                                                                                                                                                                                                                                                                                                                                                                                                                                                                                                                                                                                                                                                                                                                                                                                                                                                                                                                                                                                                                                                                                                                                                                                                                                                                                                                                                                                                                                                                                                                                                                                                                                                                                                                                                                                                                       |           |    |               |    |                 |    |   |   |                                 |   |   |  |                                  |   |   |  |                           |   |   |  |                                   |   |   |  |                    |   |   |  |                     |   |   |  |                      |   |   |  |             |   |   |  |                                 |   |   |  |                 |   |   |  |                              |   |   |  |                                 |   |   |  |                |   |   |  |                        |   |   |  |                                      |   |   |  |              |   |   |  |                |   |   |  |                    |   |   |  |                |   |   |  |             |   |   |  |              |   |   |  |                                       |   |   |  |  |
| O. COOKED, MASHED FOODS. (FUFU).....  | 1                                                                                                                                                                                                                                           | 0                                                                                                                                                                                                                                                                                                                                                                                                                                                                                                                                                                                                                                                                                                                                                                                                                                                                                                                                                                                                                                                                                                                                                                                                                                                                                                                                                                                                                                                                                                                                                                                                                                                                                                                                                                                                                                                                                                                                                                                                                                                                                                                                                                                                                                                                                                                                                                                                                                                                                                                                                                                                                                       |           |    |               |    |                 |    |   |   |                                 |   |   |  |                                  |   |   |  |                           |   |   |  |                                   |   |   |  |                    |   |   |  |                     |   |   |  |                      |   |   |  |             |   |   |  |                                 |   |   |  |                 |   |   |  |                              |   |   |  |                                 |   |   |  |                |   |   |  |                        |   |   |  |                                      |   |   |  |              |   |   |  |                |   |   |  |                    |   |   |  |                |   |   |  |             |   |   |  |              |   |   |  |                                       |   |   |  |  |
| P. RICE.....                          | 1                                                                                                                                                                                                                                           | 0                                                                                                                                                                                                                                                                                                                                                                                                                                                                                                                                                                                                                                                                                                                                                                                                                                                                                                                                                                                                                                                                                                                                                                                                                                                                                                                                                                                                                                                                                                                                                                                                                                                                                                                                                                                                                                                                                                                                                                                                                                                                                                                                                                                                                                                                                                                                                                                                                                                                                                                                                                                                                                       |           |    |               |    |                 |    |   |   |                                 |   |   |  |                                  |   |   |  |                           |   |   |  |                                   |   |   |  |                    |   |   |  |                     |   |   |  |                      |   |   |  |             |   |   |  |                                 |   |   |  |                 |   |   |  |                              |   |   |  |                                 |   |   |  |                |   |   |  |                        |   |   |  |                                      |   |   |  |              |   |   |  |                |   |   |  |                    |   |   |  |                |   |   |  |             |   |   |  |              |   |   |  |                                       |   |   |  |  |
| Q. FRUITS.....                        | 1                                                                                                                                                                                                                                           | 0                                                                                                                                                                                                                                                                                                                                                                                                                                                                                                                                                                                                                                                                                                                                                                                                                                                                                                                                                                                                                                                                                                                                                                                                                                                                                                                                                                                                                                                                                                                                                                                                                                                                                                                                                                                                                                                                                                                                                                                                                                                                                                                                                                                                                                                                                                                                                                                                                                                                                                                                                                                                                                       |           |    |               |    |                 |    |   |   |                                 |   |   |  |                                  |   |   |  |                           |   |   |  |                                   |   |   |  |                    |   |   |  |                     |   |   |  |                      |   |   |  |             |   |   |  |                                 |   |   |  |                 |   |   |  |                              |   |   |  |                                 |   |   |  |                |   |   |  |                        |   |   |  |                                      |   |   |  |              |   |   |  |                |   |   |  |                    |   |   |  |                |   |   |  |             |   |   |  |              |   |   |  |                                       |   |   |  |  |
| R. VEGETABLES.....                    | 1                                                                                                                                                                                                                                           | 0                                                                                                                                                                                                                                                                                                                                                                                                                                                                                                                                                                                                                                                                                                                                                                                                                                                                                                                                                                                                                                                                                                                                                                                                                                                                                                                                                                                                                                                                                                                                                                                                                                                                                                                                                                                                                                                                                                                                                                                                                                                                                                                                                                                                                                                                                                                                                                                                                                                                                                                                                                                                                                       |           |    |               |    |                 |    |   |   |                                 |   |   |  |                                  |   |   |  |                           |   |   |  |                                   |   |   |  |                    |   |   |  |                     |   |   |  |                      |   |   |  |             |   |   |  |                                 |   |   |  |                 |   |   |  |                              |   |   |  |                                 |   |   |  |                |   |   |  |                        |   |   |  |                                      |   |   |  |              |   |   |  |                |   |   |  |                    |   |   |  |                |   |   |  |             |   |   |  |              |   |   |  |                                       |   |   |  |  |
| S. BEANS .....                        | 1                                                                                                                                                                                                                                           | 0                                                                                                                                                                                                                                                                                                                                                                                                                                                                                                                                                                                                                                                                                                                                                                                                                                                                                                                                                                                                                                                                                                                                                                                                                                                                                                                                                                                                                                                                                                                                                                                                                                                                                                                                                                                                                                                                                                                                                                                                                                                                                                                                                                                                                                                                                                                                                                                                                                                                                                                                                                                                                                       |           |    |               |    |                 |    |   |   |                                 |   |   |  |                                  |   |   |  |                           |   |   |  |                                   |   |   |  |                    |   |   |  |                     |   |   |  |                      |   |   |  |             |   |   |  |                                 |   |   |  |                 |   |   |  |                              |   |   |  |                                 |   |   |  |                |   |   |  |                        |   |   |  |                                      |   |   |  |              |   |   |  |                |   |   |  |                    |   |   |  |                |   |   |  |             |   |   |  |              |   |   |  |                                       |   |   |  |  |
| T. EGG.....                           | 1                                                                                                                                                                                                                                           | 0                                                                                                                                                                                                                                                                                                                                                                                                                                                                                                                                                                                                                                                                                                                                                                                                                                                                                                                                                                                                                                                                                                                                                                                                                                                                                                                                                                                                                                                                                                                                                                                                                                                                                                                                                                                                                                                                                                                                                                                                                                                                                                                                                                                                                                                                                                                                                                                                                                                                                                                                                                                                                                       |           |    |               |    |                 |    |   |   |                                 |   |   |  |                                  |   |   |  |                           |   |   |  |                                   |   |   |  |                    |   |   |  |                     |   |   |  |                      |   |   |  |             |   |   |  |                                 |   |   |  |                 |   |   |  |                              |   |   |  |                                 |   |   |  |                |   |   |  |                        |   |   |  |                                      |   |   |  |              |   |   |  |                |   |   |  |                    |   |   |  |                |   |   |  |             |   |   |  |              |   |   |  |                                       |   |   |  |  |
| U. STEW.....                          | 1                                                                                                                                                                                                                                           | 0                                                                                                                                                                                                                                                                                                                                                                                                                                                                                                                                                                                                                                                                                                                                                                                                                                                                                                                                                                                                                                                                                                                                                                                                                                                                                                                                                                                                                                                                                                                                                                                                                                                                                                                                                                                                                                                                                                                                                                                                                                                                                                                                                                                                                                                                                                                                                                                                                                                                                                                                                                                                                                       |           |    |               |    |                 |    |   |   |                                 |   |   |  |                                  |   |   |  |                           |   |   |  |                                   |   |   |  |                    |   |   |  |                     |   |   |  |                      |   |   |  |             |   |   |  |                                 |   |   |  |                 |   |   |  |                              |   |   |  |                                 |   |   |  |                |   |   |  |                        |   |   |  |                                      |   |   |  |              |   |   |  |                |   |   |  |                    |   |   |  |                |   |   |  |             |   |   |  |              |   |   |  |                                       |   |   |  |  |
| V. OTHER LIQUIDS OR FOODS, SPECIFY .. | 1                                                                                                                                                                                                                                           | 0                                                                                                                                                                                                                                                                                                                                                                                                                                                                                                                                                                                                                                                                                                                                                                                                                                                                                                                                                                                                                                                                                                                                                                                                                                                                                                                                                                                                                                                                                                                                                                                                                                                                                                                                                                                                                                                                                                                                                                                                                                                                                                                                                                                                                                                                                                                                                                                                                                                                                                                                                                                                                                       |           |    |               |    |                 |    |   |   |                                 |   |   |  |                                  |   |   |  |                           |   |   |  |                                   |   |   |  |                    |   |   |  |                     |   |   |  |                      |   |   |  |             |   |   |  |                                 |   |   |  |                 |   |   |  |                              |   |   |  |                                 |   |   |  |                |   |   |  |                        |   |   |  |                                      |   |   |  |              |   |   |  |                |   |   |  |                    |   |   |  |                |   |   |  |             |   |   |  |              |   |   |  |                                       |   |   |  |  |

ID #

|                                       |                                                                     |                                      |   |                                                          |   |
|---------------------------------------|---------------------------------------------------------------------|--------------------------------------|---|----------------------------------------------------------|---|
| <b>Q212</b>                           | <i>Is the baby taking anything else in addition to breast milk?</i> | (Y=YES, N=NO)                        |   | <b>DO NOT READ OUT, PROBE AND CIRCLE A CODE FOR EACH</b> |   |
|                                       |                                                                     | Y                                    | N |                                                          |   |
|                                       |                                                                     | A. VITAMIN DROPS/MEDICINE .....      | 1 |                                                          | 0 |
|                                       |                                                                     | B. ORS.....                          | 1 |                                                          | 0 |
|                                       |                                                                     | C. PLAIN WATER.....                  | 1 |                                                          | 0 |
|                                       |                                                                     | D. SUGAR WATER/ SWEET DRINKS.....    | 1 |                                                          | 0 |
|                                       |                                                                     | E. PALM WINE.....                    | 1 |                                                          | 0 |
|                                       |                                                                     | F. FRUIT JUICE.....                  | 1 |                                                          | 0 |
|                                       |                                                                     | G. TEA.....                          | 1 |                                                          | 0 |
|                                       |                                                                     | H. PAP.....                          | 1 |                                                          | 0 |
|                                       |                                                                     | I. INFANT FORMULA (GUIGOZ).....      | 1 |                                                          | 0 |
|                                       |                                                                     | J. CERELAC.....                      | 1 |                                                          | 0 |
|                                       |                                                                     | K. FRESH MILK FROM COWS.....         | 1 |                                                          | 0 |
|                                       |                                                                     | L. LIQUID OR POWDERED MILK.....      | 1 |                                                          | 0 |
|                                       |                                                                     | M. YOGURT.....                       | 1 |                                                          | 0 |
|                                       |                                                                     | N. CUSTARD POWDER.....               | 1 |                                                          | 0 |
|                                       |                                                                     | O. COOKED, MASHED FOODS. (FUFU)..... | 1 |                                                          | 0 |
|                                       |                                                                     | P. RICE.....                         | 1 |                                                          | 0 |
|                                       |                                                                     | Q. FRUITS.....                       | 1 |                                                          | 0 |
|                                       |                                                                     | R. VEGETABLES.....                   | 1 |                                                          | 0 |
| S. BEANS .....                        | 1                                                                   | 0                                    |   |                                                          |   |
| T. EGG.....                           | 1                                                                   | 0                                    |   |                                                          |   |
| U. STEW.....                          | 1                                                                   | 0                                    |   |                                                          |   |
| V. OTHER LIQUIDS OR FOODS, SPECIFY .. | 1                                                                   | 0                                    |   |                                                          |   |

**Section 3: Client Satisfaction**

|             |                                                                                                                    |                                                                                                                                                  |              |
|-------------|--------------------------------------------------------------------------------------------------------------------|--------------------------------------------------------------------------------------------------------------------------------------------------|--------------|
| <b>Q301</b> | <i>At today's visit or during your stay in the health unit, did anyone talk to you about how to feed the baby?</i> | YES.....01<br>NO.....00<br>DON'T KNOW.....98                                                                                                     | ➔ <b>401</b> |
| <b>Q302</b> | <i>What type of health worker talked to you?</i>                                                                   | Y= YES, N=NO<br>Y N<br>NURSE/MIDWIFE.....1 0<br>NUTRITION COUNSELOR.....1 0<br>DOCTOR.....1 0<br>PEER EDUCATOR.....1 0<br>OTHER, SPECIFY.....1 0 |              |
| <b>Q303</b> | <i>Were you satisfied with the information you received about how to feed [NAME]?</i>                              | VERY SATISFIED.....03<br>SATISFIED.....02<br>UNCERTAIN.....01<br>NOT SATISFIED.....00                                                            |              |

**Section 4: Anthropometrics**

*If the child was weighed at today's clinic visit, ask to look at the child's clinic book and enter the child's weight and height below. If the child was not weighed and measured, weigh and measure the child.*

*Recumbent length will be measured to the nearest millimeter using horizontal boards. **All infant weight and length measurements should be taken in duplicate.** If differences between measurements exist, a third measurement will be taken to ensure accuracy. Weights must agree within 0.1 kg.; length to the nearest .1 cm.*

|                    |                                           |                                                                                                    |                     |
|--------------------|-------------------------------------------|----------------------------------------------------------------------------------------------------|---------------------|
| <p><b>Q401</b></p> | <p><i>May I weigh (Name)?</i></p>         | <p>YES.....01<br/>         NO.....00</p> <p style="text-align: center;"> _   _ .  _  KILOGRAMS</p> | <p>➡ <b>END</b></p> |
| <p><b>Q402</b></p> | <p><i>May I take (Name)'s length?</i></p> | <p>YES.....01<br/>         NO.....00</p> <p style="text-align: center;"> _   _   _ .  _  CM</p>    | <p>➡ <b>END</b></p> |

**Section 5: General remarks from respondent**

If the respondent has makes any comments or asks any questions please record them here in verbatim:

---



---



---



---



---

*That is the end of our questionnaire. Thank you very much for taking time to answer these questions. We appreciate your help. Please do not discuss the details of this interview with anybody for the next two weeks. This is because we intend to interview other people about the same issues. If asked by a friend, neighbor or relative about what we discussed please tell them it was about infant feeding and nutrition counseling.*



ID #

**Section 0: Respondent Screening for Children 6-8 Months**

Participant's Phone Number \_\_\_\_\_ Interviewer's Name: \_\_\_\_\_ Survey Site \_\_\_\_\_ Survey Result \_\_\_\_\_ (1=complete; 2= partially complete; 3=refused to take the survey)  
 Date of Interview \_\_\_\_/\_\_\_\_/\_\_\_\_ Identification Number: \_\_\_\_ Data Entry Clerk Name: \_\_\_\_\_  
 Date Entered: \_\_\_\_/\_\_\_\_/\_\_\_\_

**INSTRUCTIONS TO INTERVIEWER:** IF THE WOMEN GAVE VERBAL CONSENT TO THE SURVEY, ASK THESE QUESTIONS IN A PRIVATE AREA. IF SHE DOES NOT WANT TO ANSWER SOME OF THE QUESTIONS, REASSURE HER THAT SHE CAN REFUSE TO ANSWER ANY OF THEM

| No.  | QUESTIONS AND FILTERS                                                                                                                                                                                                                                                                                      | CODING CATEGORIES                                                                                                                                                                                                                                                    | SKIP TO |
|------|------------------------------------------------------------------------------------------------------------------------------------------------------------------------------------------------------------------------------------------------------------------------------------------------------------|----------------------------------------------------------------------------------------------------------------------------------------------------------------------------------------------------------------------------------------------------------------------|---------|
| Q001 | Do you have a child who is at least 6 months old but less than 9 months old?<br><br><b>IF INFANT IS YOUNGER THAN 6 MONTHS OR IS 9 MONTHS 1 WEEK OLDER, THE MOTHER SHOULD NOT BE INTERVIEWED WITH THIS QUESTIONNAIRE</b>                                                                                    | YES .....01<br><br>NO.....00                                                                                                                                                                                                                                         |         |
| Q002 | What is the date of birth of the child?<br><b>IF THERE IS NO DOCUMENT SHOWING THE CHILD'S DOB, ASK THE MOTHER OR CAREGIVER IF SHE KNOWS THE CHILD'S DOB. RECORD HER RESPONSE.</b><br><br><b>IF YOU CANNOT OBTAIN DOB FROM A CARD OR THE MOTHER, YOU WILL NEED AND ASK THE MOTHER HOW OLD THE CHILD IS.</b> | ____/____/____<br>DD MM YY                                                                                                                                                                                                                                           |         |
| Q003 | Source for date of birth<br><b>CARD COULD BE AN IDENTIFICATION CARD, A HEALTH OR IMMUNIZATION CARD, A BIRTH CERTIFICATE OR A BAPTISMAL CERTIFICATE.</b>                                                                                                                                                    | <b>Circle number not responses</b><br>CARD -----> 1<br>CAREGIVER-----> 2<br>DON'T KNOW-----> 8                                                                                                                                                                       |         |
| Q004 | How old are you?<br><b>IF CAREGIVER IS OLDER THAN 60 YEARS OR YOUNGER THAN 21 DO NOT CONTINUE. IF THE MOTHER IS OLDER THAN 60 YEARS OR YOUNGER THAN 18 YEARS DO NOT CONTINUE.</b>                                                                                                                          | <input type="text"/> <input type="text"/><br>AGE IN YEARS<br>DON'T KNOW.....98<br>NO RESPONSE.....99                                                                                                                                                                 |         |
| Q005 | Have you been interviewed about breastfeeding and child feeding in the last five months?                                                                                                                                                                                                                   | YES .....01<br><br>NO.....00                                                                                                                                                                                                                                         | →Q007   |
| Q006 | Where were you interviewed?<br><br><b>IF CAREGIVER NAMED ANY OF THE SITES LISTED IN THE COLUMN TO THE RIGHT THANK HIM OR HER AND DO NOT CONTINUE</b>                                                                                                                                                       | BANSO BAPTIST HOSPITAL.....01<br>NW REGIONAL HOSPITAL.....02<br>MBINGO BAPTIST HOSPITAL..... 03<br>BELO BAPTIST HEALTH CENTER...04<br>BANGOLAN HEALTH CENTER .....05<br>CDC MUKONJE HEALTH CENTER...06<br>BAPTIST HOSPITAL MUTENGENE...07<br>TIKO HOLFORT CMA.....08 |         |
| Q007 | Has the child attended IWC elsewhere or been to any other health facilities?                                                                                                                                                                                                                               | YES .....01<br><br>NO.....00                                                                                                                                                                                                                                         |         |

## Infant Feeding Survey for Children 6-8 Months

### **CLINIC-BASED SURVEY** **FOR USE WITH** **CAREGIVERS OF INFANTS AGE 6 TO 8 MONTHS OLD** **Asking questions and recording answers**

With the exception of questions 401-401, all questions in this module are based on mothers' (or other caregivers') recall. It is very important that you ask each question exactly as it is written on the questionnaire. If the mother or caregiver does not understand the question, you may need to use extra probing questions. Probing questions are discussed during interviewer training. It is important that all interviewers use the same probing questions.

In addition to the questions, there are statements that appear in all capital letters. These are interviewer instructions, and should not be read aloud to the mother/caregiver.

Most questions have pre-coded responses. It is important that you do not read these choices aloud. When you ask a question, you should listen to the mother's/caregiver's answer, then circle the code next to the category that best matches her answer.

#### **Q.201: Ever breastfed child**

In this question it does not matter how long the mother breastfed the child, only whether or not she ever gave the child the breast.

#### **Q.203: Currently breastfeeding**

For Question 206, it does not matter if the mother is giving (NAME) other liquids or foods as well as breast milk; what is of interest is if the infant or child is breastfeeding at all. (NAME refers to child's name.)

#### **Q.204: Duration of breastfeeding**

This question is only for mothers who are no longer breastfeeding the infant or child in question. It is important to try to get as accurate information as possible. If the caregiver says she cannot remember how long she breastfed the infant or child, urge her to think about it for a while, or ask her if she remembers how old the infant or child was when she completely stopped breastfeeding him/her. If the mother gives an approximate answer, such as "about one year," establish if it was exactly one year or how much more or less.

Record the number of months when the mother completely stopped breastfeeding the infant or child. It does not matter if she was giving the infant or child other liquids or foods in addition to breast milk; you are simply recording how many months she breastfed the infant or child.

### **Qs.211, 214 Other Liquids and foods given**

The main purpose of questions 211 and 214 is to obtain a better picture of the diversity of the child's diet. You will ask the mother or other caregiver about the types of liquids and foods given to the child the day preceding the interview ("yesterday during the day or at night").

Question 211 asks about different liquids and foods given yesterday. It is important to ask about all the different kinds of liquids and foods. One reason is that for almost all infants less than 6 months old, only breast milk is recommended. We need to know if young infants are getting other liquids.

Read the question slowly and then read the liquids and foods in the list. Wait for the mother's/caregiver's response after each liquid or food and record whether the infant or child had each liquid (or group of liquids).

Question 214 asks about other liquids and foods the caregiver gives to the child, but may not have given yesterday. Do not read out these foods, but ask if the caregiver has ever given other foods or liquids besides breast milk. Some foods in the list are listed as a single item – for example, vegetables – but may usually be eaten in a sauce, soup or stew. If the infant or child has eaten a mixed food like a sauce, soup, or stew, record all the food groups in the mixed food. For example, if the child ate a stew of beans, tomatoes, and green leaves, there should be a check mark for each of the three food groups that contain these foods.

Do not check off foods that have been added in very small amounts, or for seasoning. For example, if a spoon of pepe is added to a pot of stew, do not record that the infant or child has eaten vegetable. If one chili pepper is included in the family pot, do not record that as an "other fruit or vegetable."

### **Qs. 212, 213 How many times infant or child ate yesterday**

Question 212 asks at which age did the caregiver give the child solid/semi-solid foods. Ask the mother/caregiver the question just as it is written. You may need to use probes to help her remember at what age was food offered.

Solid/semi-solid foods include family foods, and also many special dishes prepared for infants. Thick soups and stews should be included. Thick paps and porridges are also included. Very thin, watery soups and gruels should not be included because infants and young children do not get enough energy (calories) from very thin soups and gruels.

Liquids do not count for this question. Also, very small snacks, such as a bite or two of someone else's food, should not be counted.

Question 213 asks about how many times the infant or child ate solid/semi-solid foods yesterday. Ask the mother/caregiver the question just as it is written. You may need to use probes to help her remember all the times her infant or child ate yesterday.

| <b>Section 1: Background Characteristics</b>                              |                                                                                              |                                                                                                                                                                                                    |         |
|---------------------------------------------------------------------------|----------------------------------------------------------------------------------------------|----------------------------------------------------------------------------------------------------------------------------------------------------------------------------------------------------|---------|
| <b><i>I WILL START WITH A FEW QUESTIONS ABOUT YOUR OWN BACKGROUND</i></b> |                                                                                              |                                                                                                                                                                                                    |         |
| NO.                                                                       | QUESTIONS AND FILTERS                                                                        | CODING CATEGORIES                                                                                                                                                                                  | SKIP TO |
| Q101                                                                      | <i>Is the respondent male or female?</i>                                                     | FEMALE.....01<br>MALE..... 02                                                                                                                                                                      |         |
| Q102                                                                      | <i>Are you the child's biological mother or father?</i>                                      | NO.....00<br>YES.....01                                                                                                                                                                            |         |
| Q103                                                                      | <i>How many years of school have you completed, without repeating?</i>                       | <input type="text"/> <input type="text"/><br>YEARS COMPLETED<br>DON'T KNOW..... 98<br>NO RESPONSE.....99                                                                                           |         |
| Q104                                                                      | <i>What is your religion?</i>                                                                | CHRISTIAN.....01<br>MUSLIM.....02<br>TRADITIONAL.....03<br>NO RELIGION.....04<br>OTHER (SPECIFY):.....05                                                                                           |         |
| Q105                                                                      | <i>What is your main occupation?</i><br><b>WHAT KIND OF WORK DO YOU DO MOST OF THE TIME?</b> | SELF-EMPLOYED.....01<br>CIVIL SERVANT.....02<br>HEALTH WORKER.....03<br>TECHNICIAN.....04<br>FARMER.....05<br>STUDENT.....06<br>OTHER (SPECIFY):.....07<br>DON'T KNOW.....98<br>NO RESPONSE.....99 |         |
| Q106                                                                      | <i>What is your marital status?</i>                                                          | MARRIED.....01<br>COHABITING.....02<br>SINGLE.....03<br>WIDOWED.....04<br>SEPARATED/DIVORCED.....05<br>DON'T KNOW.....98<br>NO RESPONSE.....99                                                     |         |
| Q107                                                                      | <i>Which of the following items does your family own? (Circle all that apply)</i>            | Y= YES, N=NO<br>Y      N<br>RADIO.....1      0<br>TELEVISION.....1      0<br>MOTORBIKE.....1      0<br>CAR.....1      0                                                                            |         |
| Q108                                                                      | <i>How many pregnancies have you had before?</i><br><b>ONLY ASK TO FEMALE PARTICIPANTS</b>   | NONE.....00<br>ONE.....01<br>TWO.....02<br>THREE.....03<br>FOUR.....04<br>MORE THAN FIVE.....05<br>OTHER, SPECIFY:.....06<br>DON'T KNOW.....98<br>NO RESPONSE.....99                               | →Q201   |
| Q109                                                                      | <i>Out of the pregnancies how many children are alive?</i>                                   | NONE.....00<br>ONE.....01<br>TWO.....02<br>THREE.....03<br>FOUR.....04<br>MORE THAN FIVE.....05<br>OTHER, SPECIFY:.....06<br>DON'T KNOW.....98<br>NO RESPONSE.....99                               |         |

## Section 2: Infant Feeding

| No.                                                                | Questions and filters                                                                                                        | Coding categories                                                                                                                                                                                                                                                                                                                                                                                                                                 | Skip to                                                                                                              |
|--------------------------------------------------------------------|------------------------------------------------------------------------------------------------------------------------------|---------------------------------------------------------------------------------------------------------------------------------------------------------------------------------------------------------------------------------------------------------------------------------------------------------------------------------------------------------------------------------------------------------------------------------------------------|----------------------------------------------------------------------------------------------------------------------|
| <b><i>NOW I'D LIKE TO ASK YOU A FEW QUESTIONS ABOUT (NAME)</i></b> |                                                                                                                              |                                                                                                                                                                                                                                                                                                                                                                                                                                                   |                                                                                                                      |
| Q201                                                               | <i>Has [NAME] ever breastfed?</i>                                                                                            | YES .....01<br>NO.....00                                                                                                                                                                                                                                                                                                                                                                                                                          | →203                                                                                                                 |
| Q202                                                               | <i>What was the <u>main</u> reason you or the mother did not ever breastfeed (NAME)?</i><br><br><b>DO NOT READ RESPONSES</b> | MOTHER ILL/WEAK.....01<br>CHILD ILL/WEAK.....02<br>NIPPLE/BREAST PROBLEM.....03<br>INSUFFICIENT MILK .....04<br>MOTHER WORKING/PLANNING TO WORK...05<br>CHILD REFUSED .....06<br>STARTED CONTRACEPTIVES.....07<br>WORRIED ABOUT HIV/AIDS.....08<br>DOCTOR'S ADVICE .....09<br>OTHER HEALTH PROVIDER'S ADVICE.....10<br>SPECIFY:<br>ADVICE OF FAMILY MEMBER/FRIENDS .....11<br>OTHER, SPECIFY: .....12<br>DON'T KNOW.....98<br>NO RESPONSE .....99 | →301<br>→301<br>→301<br>→301<br>→301<br>→301<br>→301<br>→301<br>→301<br>→301<br>→301<br>→301<br>→301<br>→301<br>→301 |
| Q203                                                               | <i>Is [NAME] still receiving breast milk</i>                                                                                 | YES .....01<br>NO.....00                                                                                                                                                                                                                                                                                                                                                                                                                          | →205                                                                                                                 |
| Q204                                                               | <i>How long do you think [NAME] will take breast milk?</i>                                                                   | NUMBER OF MONTHS .....[ ][ ]<br>DON'T KNOW .....98                                                                                                                                                                                                                                                                                                                                                                                                | →207<br>→207                                                                                                         |
| Q205                                                               | <i>For how many months was [NAME] breastfed?</i><br><br><b>IF LESS THAN 1 MONTH, RECORD '0'.</b>                             | NUMBER OF MONTHS .....[ ][ ]<br>DON'T REMEMBER .....98                                                                                                                                                                                                                                                                                                                                                                                            |                                                                                                                      |

| <b>Q206</b>                      | <i>Why did you or the mother stop breastfeeding (NAME)?</i><br><br><b>IF MORE THAN ONE ANSWER GIVEN, PROBE FOR MAIN REASON.</b><br><br><b>DO NOT READ RESPONSES.</b> | MOTHER ILL/WEAK.....01<br>CHILD ILL/WEAK.....02<br>NIPPLE/BREAST PROBLEM.....03<br>INSUFFICIENT MILK .....04<br>MOTHER WORKING/PLANNING TO WORK...05<br>CHILD REFUSED .....06<br>STARTED CONTRACEPTIVES.....07<br>WORRIED ABOUT HIV/AIDS.....08<br>DOCTOR'S ADVICE .....09<br>OTHER HEALTH PROVIDER'S ADVICE.....10<br>SPECIFY: _____<br>ADVICE OF FAMILY MEMBER/FRIENDS .....11<br>OTHER, SPECIFY: _____12<br>DON'T KNOW.....98<br>NO RESPONSE .....99                                                                                                                                                                                                                                                                                                                                                                                                                                                                                                                                                                                                                                                                                             |             |   |   |                           |   |   |                                  |   |   |                           |   |   |                           |   |   |                    |   |   |              |   |   |                           |   |   |  |
|----------------------------------|----------------------------------------------------------------------------------------------------------------------------------------------------------------------|-----------------------------------------------------------------------------------------------------------------------------------------------------------------------------------------------------------------------------------------------------------------------------------------------------------------------------------------------------------------------------------------------------------------------------------------------------------------------------------------------------------------------------------------------------------------------------------------------------------------------------------------------------------------------------------------------------------------------------------------------------------------------------------------------------------------------------------------------------------------------------------------------------------------------------------------------------------------------------------------------------------------------------------------------------------------------------------------------------------------------------------------------------|-------------|---|---|---------------------------|---|---|----------------------------------|---|---|---------------------------|---|---|---------------------------|---|---|--------------------|---|---|--------------|---|---|---------------------------|---|---|--|
| <b>Q207</b>                      | <i>Did you or the mother receive assistance to start breastfeeding?</i>                                                                                              | YES.....01<br>NO.....00                                                                                                                                                                                                                                                                                                                                                                                                                                                                                                                                                                                                                                                                                                                                                                                                                                                                                                                                                                                                                                                                                                                             | <b>→210</b> |   |   |                           |   |   |                                  |   |   |                           |   |   |                           |   |   |                    |   |   |              |   |   |                           |   |   |  |
| <b>Q208</b>                      | <i>By who?</i><br><br><b>CIRCLE YES FOR ANY PERSON WHO PROVIDED ASSISTANCE</b>                                                                                       | <p style="text-align: right;">Y= YES, N=NO</p> <table style="width: 100%; border-collapse: collapse;"> <thead> <tr> <th style="width: 80%;"></th> <th style="width: 10%; text-align: center;">Y</th> <th style="width: 10%; text-align: center;">N</th> </tr> </thead> <tbody> <tr> <td>NURSE/MIDWIFE.....</td> <td style="text-align: center;">1</td> <td style="text-align: center;">0</td> </tr> <tr> <td>NUTRITION COUNSELOR.....</td> <td style="text-align: center;">1</td> <td style="text-align: center;">0</td> </tr> <tr> <td>DOCTOR.....</td> <td style="text-align: center;">1</td> <td style="text-align: center;">0</td> </tr> <tr> <td>FAMILY MEMBER.....</td> <td style="text-align: center;">1</td> <td style="text-align: center;">0</td> </tr> <tr> <td>PEER EDUCATOR.....</td> <td style="text-align: center;">1</td> <td style="text-align: center;">0</td> </tr> <tr> <td>HUSBAND.....</td> <td style="text-align: center;">1</td> <td style="text-align: center;">0</td> </tr> <tr> <td>OTHER, SPECIFY _____.....</td> <td style="text-align: center;">1</td> <td style="text-align: center;">0</td> </tr> </tbody> </table> |             | Y | N | NURSE/MIDWIFE.....        | 1 | 0 | NUTRITION COUNSELOR.....         | 1 | 0 | DOCTOR.....               | 1 | 0 | FAMILY MEMBER.....        | 1 | 0 | PEER EDUCATOR..... | 1 | 0 | HUSBAND..... | 1 | 0 | OTHER, SPECIFY _____..... | 1 | 0 |  |
|                                  | Y                                                                                                                                                                    | N                                                                                                                                                                                                                                                                                                                                                                                                                                                                                                                                                                                                                                                                                                                                                                                                                                                                                                                                                                                                                                                                                                                                                   |             |   |   |                           |   |   |                                  |   |   |                           |   |   |                           |   |   |                    |   |   |              |   |   |                           |   |   |  |
| NURSE/MIDWIFE.....               | 1                                                                                                                                                                    | 0                                                                                                                                                                                                                                                                                                                                                                                                                                                                                                                                                                                                                                                                                                                                                                                                                                                                                                                                                                                                                                                                                                                                                   |             |   |   |                           |   |   |                                  |   |   |                           |   |   |                           |   |   |                    |   |   |              |   |   |                           |   |   |  |
| NUTRITION COUNSELOR.....         | 1                                                                                                                                                                    | 0                                                                                                                                                                                                                                                                                                                                                                                                                                                                                                                                                                                                                                                                                                                                                                                                                                                                                                                                                                                                                                                                                                                                                   |             |   |   |                           |   |   |                                  |   |   |                           |   |   |                           |   |   |                    |   |   |              |   |   |                           |   |   |  |
| DOCTOR.....                      | 1                                                                                                                                                                    | 0                                                                                                                                                                                                                                                                                                                                                                                                                                                                                                                                                                                                                                                                                                                                                                                                                                                                                                                                                                                                                                                                                                                                                   |             |   |   |                           |   |   |                                  |   |   |                           |   |   |                           |   |   |                    |   |   |              |   |   |                           |   |   |  |
| FAMILY MEMBER.....               | 1                                                                                                                                                                    | 0                                                                                                                                                                                                                                                                                                                                                                                                                                                                                                                                                                                                                                                                                                                                                                                                                                                                                                                                                                                                                                                                                                                                                   |             |   |   |                           |   |   |                                  |   |   |                           |   |   |                           |   |   |                    |   |   |              |   |   |                           |   |   |  |
| PEER EDUCATOR.....               | 1                                                                                                                                                                    | 0                                                                                                                                                                                                                                                                                                                                                                                                                                                                                                                                                                                                                                                                                                                                                                                                                                                                                                                                                                                                                                                                                                                                                   |             |   |   |                           |   |   |                                  |   |   |                           |   |   |                           |   |   |                    |   |   |              |   |   |                           |   |   |  |
| HUSBAND.....                     | 1                                                                                                                                                                    | 0                                                                                                                                                                                                                                                                                                                                                                                                                                                                                                                                                                                                                                                                                                                                                                                                                                                                                                                                                                                                                                                                                                                                                   |             |   |   |                           |   |   |                                  |   |   |                           |   |   |                           |   |   |                    |   |   |              |   |   |                           |   |   |  |
| OTHER, SPECIFY _____.....        | 1                                                                                                                                                                    | 0                                                                                                                                                                                                                                                                                                                                                                                                                                                                                                                                                                                                                                                                                                                                                                                                                                                                                                                                                                                                                                                                                                                                                   |             |   |   |                           |   |   |                                  |   |   |                           |   |   |                           |   |   |                    |   |   |              |   |   |                           |   |   |  |
| <b>Q209</b>                      | <i>What information did they provide?</i><br><br><b>CIRCLE YES FOR ANY TYPE OF INFORMATION PROVIDED</b>                                                              | <p style="text-align: right;">Y= YES, N=NO</p> <table style="width: 100%; border-collapse: collapse;"> <thead> <tr> <th style="width: 80%;"></th> <th style="width: 10%; text-align: center;">Y</th> <th style="width: 10%; text-align: center;">N</th> </tr> </thead> <tbody> <tr> <td>ATTACHMENT TO BREAST.....</td> <td style="text-align: center;">1</td> <td style="text-align: center;">0</td> </tr> <tr> <td>HOW TO STIMULATE BREASTMILK.....</td> <td style="text-align: center;">1</td> <td style="text-align: center;">0</td> </tr> <tr> <td>WHAT TO EAT OR DRINK.....</td> <td style="text-align: center;">1</td> <td style="text-align: center;">0</td> </tr> <tr> <td>OTHER, SPECIFY _____.....</td> <td style="text-align: center;">1</td> <td style="text-align: center;">0</td> </tr> </tbody> </table>                                                                                                                                                                                                                                                                                                                             |             | Y | N | ATTACHMENT TO BREAST..... | 1 | 0 | HOW TO STIMULATE BREASTMILK..... | 1 | 0 | WHAT TO EAT OR DRINK..... | 1 | 0 | OTHER, SPECIFY _____..... | 1 | 0 |                    |   |   |              |   |   |                           |   |   |  |
|                                  | Y                                                                                                                                                                    | N                                                                                                                                                                                                                                                                                                                                                                                                                                                                                                                                                                                                                                                                                                                                                                                                                                                                                                                                                                                                                                                                                                                                                   |             |   |   |                           |   |   |                                  |   |   |                           |   |   |                           |   |   |                    |   |   |              |   |   |                           |   |   |  |
| ATTACHMENT TO BREAST.....        | 1                                                                                                                                                                    | 0                                                                                                                                                                                                                                                                                                                                                                                                                                                                                                                                                                                                                                                                                                                                                                                                                                                                                                                                                                                                                                                                                                                                                   |             |   |   |                           |   |   |                                  |   |   |                           |   |   |                           |   |   |                    |   |   |              |   |   |                           |   |   |  |
| HOW TO STIMULATE BREASTMILK..... | 1                                                                                                                                                                    | 0                                                                                                                                                                                                                                                                                                                                                                                                                                                                                                                                                                                                                                                                                                                                                                                                                                                                                                                                                                                                                                                                                                                                                   |             |   |   |                           |   |   |                                  |   |   |                           |   |   |                           |   |   |                    |   |   |              |   |   |                           |   |   |  |
| WHAT TO EAT OR DRINK.....        | 1                                                                                                                                                                    | 0                                                                                                                                                                                                                                                                                                                                                                                                                                                                                                                                                                                                                                                                                                                                                                                                                                                                                                                                                                                                                                                                                                                                                   |             |   |   |                           |   |   |                                  |   |   |                           |   |   |                           |   |   |                    |   |   |              |   |   |                           |   |   |  |
| OTHER, SPECIFY _____.....        | 1                                                                                                                                                                    | 0                                                                                                                                                                                                                                                                                                                                                                                                                                                                                                                                                                                                                                                                                                                                                                                                                                                                                                                                                                                                                                                                                                                                                   |             |   |   |                           |   |   |                                  |   |   |                           |   |   |                           |   |   |                    |   |   |              |   |   |                           |   |   |  |
| <b>Q210</b>                      | <i>Since yesterday has [NAME] received breast milk from the mother or any other person?</i>                                                                          | YES .....01<br>NO.....00<br>DON'T KNOW.....98                                                                                                                                                                                                                                                                                                                                                                                                                                                                                                                                                                                                                                                                                                                                                                                                                                                                                                                                                                                                                                                                                                       |             |   |   |                           |   |   |                                  |   |   |                           |   |   |                           |   |   |                    |   |   |              |   |   |                           |   |   |  |

| <p><b>Q211</b></p>                   | <p><i>Since yesterday has [NAME] received any of these things?</i></p> <p><b>INTERVIEWER SHOULD ASK ABOUT EACH OPTION AND RECORD THE ANSWER. AFTER ASKING ALL OPTIONS, THEN ASK “DID THE BABY EAT ANYTHING ELSE DURING THE PAST 24 HOURS?”</b></p> | <p>(Y=YES, N=NO)</p> <table border="0"> <thead> <tr> <th></th> <th style="text-align: center;">Y</th> <th style="text-align: center;">N</th> </tr> </thead> <tbody> <tr><td>A. VITAMIN DROPS/MEDICINE .....</td><td style="text-align: center;">1</td><td style="text-align: center;">0</td></tr> <tr><td>B. ORS.....</td><td style="text-align: center;">1</td><td style="text-align: center;">0</td></tr> <tr><td>C. PLAIN WATER.....</td><td style="text-align: center;">1</td><td style="text-align: center;">0</td></tr> <tr><td>D. SUGAR WATER/ SWEET DRINKS.....</td><td style="text-align: center;">1</td><td style="text-align: center;">0</td></tr> <tr><td>E. PALM WINE.....</td><td style="text-align: center;">1</td><td style="text-align: center;">0</td></tr> <tr><td>F. FRUIT JUICE.....</td><td style="text-align: center;">1</td><td style="text-align: center;">0</td></tr> <tr><td>G. TEA.....</td><td style="text-align: center;">1</td><td style="text-align: center;">0</td></tr> <tr><td>H. PAP.....</td><td style="text-align: center;">1</td><td style="text-align: center;">0</td></tr> <tr><td>I. INFANT FORMULA (GUIGOZ).....</td><td style="text-align: center;">1</td><td style="text-align: center;">0</td></tr> <tr><td>J. CERELAC.....</td><td style="text-align: center;">1</td><td style="text-align: center;">0</td></tr> <tr><td>K. FRESH MILK FROM COWS.....</td><td style="text-align: center;">1</td><td style="text-align: center;">0</td></tr> <tr><td>L. LIQUID OR POWDERED MILK.....</td><td style="text-align: center;">1</td><td style="text-align: center;">0</td></tr> <tr><td>M. YOGURT.....</td><td style="text-align: center;">1</td><td style="text-align: center;">0</td></tr> <tr><td>N. CUSTARD POWDER.....</td><td style="text-align: center;">1</td><td style="text-align: center;">0</td></tr> <tr><td>O. COOKED, MASHED FOODS. (FUFU).....</td><td style="text-align: center;">1</td><td style="text-align: center;">0</td></tr> <tr><td>P. RICE.....</td><td style="text-align: center;">1</td><td style="text-align: center;">0</td></tr> <tr><td>Q. FRUITS.....</td><td style="text-align: center;">1</td><td style="text-align: center;">0</td></tr> <tr><td>R. VEGETABLES.....</td><td style="text-align: center;">1</td><td style="text-align: center;">0</td></tr> <tr><td>S. BEANS .....</td><td style="text-align: center;">1</td><td style="text-align: center;">0</td></tr> <tr><td>T. EGG.....</td><td style="text-align: center;">1</td><td style="text-align: center;">0</td></tr> <tr><td>U. STEW.....</td><td style="text-align: center;">1</td><td style="text-align: center;">0</td></tr> <tr><td>V. OTHER LIQUIDS OR FOODS, SPECIFY..</td><td style="text-align: center;">1</td><td style="text-align: center;">0</td></tr> </tbody> </table> |             | Y | N | A. VITAMIN DROPS/MEDICINE ..... | 1 | 0 | B. ORS..... | 1 | 0 | C. PLAIN WATER..... | 1 | 0 | D. SUGAR WATER/ SWEET DRINKS..... | 1 | 0 | E. PALM WINE..... | 1 | 0 | F. FRUIT JUICE..... | 1 | 0 | G. TEA..... | 1 | 0 | H. PAP..... | 1 | 0 | I. INFANT FORMULA (GUIGOZ)..... | 1 | 0 | J. CERELAC..... | 1 | 0 | K. FRESH MILK FROM COWS..... | 1 | 0 | L. LIQUID OR POWDERED MILK..... | 1 | 0 | M. YOGURT..... | 1 | 0 | N. CUSTARD POWDER..... | 1 | 0 | O. COOKED, MASHED FOODS. (FUFU)..... | 1 | 0 | P. RICE..... | 1 | 0 | Q. FRUITS..... | 1 | 0 | R. VEGETABLES..... | 1 | 0 | S. BEANS ..... | 1 | 0 | T. EGG..... | 1 | 0 | U. STEW..... | 1 | 0 | V. OTHER LIQUIDS OR FOODS, SPECIFY.. | 1 | 0 |  |
|--------------------------------------|----------------------------------------------------------------------------------------------------------------------------------------------------------------------------------------------------------------------------------------------------|-------------------------------------------------------------------------------------------------------------------------------------------------------------------------------------------------------------------------------------------------------------------------------------------------------------------------------------------------------------------------------------------------------------------------------------------------------------------------------------------------------------------------------------------------------------------------------------------------------------------------------------------------------------------------------------------------------------------------------------------------------------------------------------------------------------------------------------------------------------------------------------------------------------------------------------------------------------------------------------------------------------------------------------------------------------------------------------------------------------------------------------------------------------------------------------------------------------------------------------------------------------------------------------------------------------------------------------------------------------------------------------------------------------------------------------------------------------------------------------------------------------------------------------------------------------------------------------------------------------------------------------------------------------------------------------------------------------------------------------------------------------------------------------------------------------------------------------------------------------------------------------------------------------------------------------------------------------------------------------------------------------------------------------------------------------------------------------------------------------------------------------------------------------------------------------------------------------------------------------------------------------------------------------------------------------------------------------------------------------------------------------------------------------------------------------------------------------------------------------------------------------------------------------------------------------------------------------------------------------------------------------------------------------------------------------------------------------------------------------------------------------------------------------------------------------------------------|-------------|---|---|---------------------------------|---|---|-------------|---|---|---------------------|---|---|-----------------------------------|---|---|-------------------|---|---|---------------------|---|---|-------------|---|---|-------------|---|---|---------------------------------|---|---|-----------------|---|---|------------------------------|---|---|---------------------------------|---|---|----------------|---|---|------------------------|---|---|--------------------------------------|---|---|--------------|---|---|----------------|---|---|--------------------|---|---|----------------|---|---|-------------|---|---|--------------|---|---|--------------------------------------|---|---|--|
|                                      | Y                                                                                                                                                                                                                                                  | N                                                                                                                                                                                                                                                                                                                                                                                                                                                                                                                                                                                                                                                                                                                                                                                                                                                                                                                                                                                                                                                                                                                                                                                                                                                                                                                                                                                                                                                                                                                                                                                                                                                                                                                                                                                                                                                                                                                                                                                                                                                                                                                                                                                                                                                                                                                                                                                                                                                                                                                                                                                                                                                                                                                                                                                                                             |             |   |   |                                 |   |   |             |   |   |                     |   |   |                                   |   |   |                   |   |   |                     |   |   |             |   |   |             |   |   |                                 |   |   |                 |   |   |                              |   |   |                                 |   |   |                |   |   |                        |   |   |                                      |   |   |              |   |   |                |   |   |                    |   |   |                |   |   |             |   |   |              |   |   |                                      |   |   |  |
| A. VITAMIN DROPS/MEDICINE .....      | 1                                                                                                                                                                                                                                                  | 0                                                                                                                                                                                                                                                                                                                                                                                                                                                                                                                                                                                                                                                                                                                                                                                                                                                                                                                                                                                                                                                                                                                                                                                                                                                                                                                                                                                                                                                                                                                                                                                                                                                                                                                                                                                                                                                                                                                                                                                                                                                                                                                                                                                                                                                                                                                                                                                                                                                                                                                                                                                                                                                                                                                                                                                                                             |             |   |   |                                 |   |   |             |   |   |                     |   |   |                                   |   |   |                   |   |   |                     |   |   |             |   |   |             |   |   |                                 |   |   |                 |   |   |                              |   |   |                                 |   |   |                |   |   |                        |   |   |                                      |   |   |              |   |   |                |   |   |                    |   |   |                |   |   |             |   |   |              |   |   |                                      |   |   |  |
| B. ORS.....                          | 1                                                                                                                                                                                                                                                  | 0                                                                                                                                                                                                                                                                                                                                                                                                                                                                                                                                                                                                                                                                                                                                                                                                                                                                                                                                                                                                                                                                                                                                                                                                                                                                                                                                                                                                                                                                                                                                                                                                                                                                                                                                                                                                                                                                                                                                                                                                                                                                                                                                                                                                                                                                                                                                                                                                                                                                                                                                                                                                                                                                                                                                                                                                                             |             |   |   |                                 |   |   |             |   |   |                     |   |   |                                   |   |   |                   |   |   |                     |   |   |             |   |   |             |   |   |                                 |   |   |                 |   |   |                              |   |   |                                 |   |   |                |   |   |                        |   |   |                                      |   |   |              |   |   |                |   |   |                    |   |   |                |   |   |             |   |   |              |   |   |                                      |   |   |  |
| C. PLAIN WATER.....                  | 1                                                                                                                                                                                                                                                  | 0                                                                                                                                                                                                                                                                                                                                                                                                                                                                                                                                                                                                                                                                                                                                                                                                                                                                                                                                                                                                                                                                                                                                                                                                                                                                                                                                                                                                                                                                                                                                                                                                                                                                                                                                                                                                                                                                                                                                                                                                                                                                                                                                                                                                                                                                                                                                                                                                                                                                                                                                                                                                                                                                                                                                                                                                                             |             |   |   |                                 |   |   |             |   |   |                     |   |   |                                   |   |   |                   |   |   |                     |   |   |             |   |   |             |   |   |                                 |   |   |                 |   |   |                              |   |   |                                 |   |   |                |   |   |                        |   |   |                                      |   |   |              |   |   |                |   |   |                    |   |   |                |   |   |             |   |   |              |   |   |                                      |   |   |  |
| D. SUGAR WATER/ SWEET DRINKS.....    | 1                                                                                                                                                                                                                                                  | 0                                                                                                                                                                                                                                                                                                                                                                                                                                                                                                                                                                                                                                                                                                                                                                                                                                                                                                                                                                                                                                                                                                                                                                                                                                                                                                                                                                                                                                                                                                                                                                                                                                                                                                                                                                                                                                                                                                                                                                                                                                                                                                                                                                                                                                                                                                                                                                                                                                                                                                                                                                                                                                                                                                                                                                                                                             |             |   |   |                                 |   |   |             |   |   |                     |   |   |                                   |   |   |                   |   |   |                     |   |   |             |   |   |             |   |   |                                 |   |   |                 |   |   |                              |   |   |                                 |   |   |                |   |   |                        |   |   |                                      |   |   |              |   |   |                |   |   |                    |   |   |                |   |   |             |   |   |              |   |   |                                      |   |   |  |
| E. PALM WINE.....                    | 1                                                                                                                                                                                                                                                  | 0                                                                                                                                                                                                                                                                                                                                                                                                                                                                                                                                                                                                                                                                                                                                                                                                                                                                                                                                                                                                                                                                                                                                                                                                                                                                                                                                                                                                                                                                                                                                                                                                                                                                                                                                                                                                                                                                                                                                                                                                                                                                                                                                                                                                                                                                                                                                                                                                                                                                                                                                                                                                                                                                                                                                                                                                                             |             |   |   |                                 |   |   |             |   |   |                     |   |   |                                   |   |   |                   |   |   |                     |   |   |             |   |   |             |   |   |                                 |   |   |                 |   |   |                              |   |   |                                 |   |   |                |   |   |                        |   |   |                                      |   |   |              |   |   |                |   |   |                    |   |   |                |   |   |             |   |   |              |   |   |                                      |   |   |  |
| F. FRUIT JUICE.....                  | 1                                                                                                                                                                                                                                                  | 0                                                                                                                                                                                                                                                                                                                                                                                                                                                                                                                                                                                                                                                                                                                                                                                                                                                                                                                                                                                                                                                                                                                                                                                                                                                                                                                                                                                                                                                                                                                                                                                                                                                                                                                                                                                                                                                                                                                                                                                                                                                                                                                                                                                                                                                                                                                                                                                                                                                                                                                                                                                                                                                                                                                                                                                                                             |             |   |   |                                 |   |   |             |   |   |                     |   |   |                                   |   |   |                   |   |   |                     |   |   |             |   |   |             |   |   |                                 |   |   |                 |   |   |                              |   |   |                                 |   |   |                |   |   |                        |   |   |                                      |   |   |              |   |   |                |   |   |                    |   |   |                |   |   |             |   |   |              |   |   |                                      |   |   |  |
| G. TEA.....                          | 1                                                                                                                                                                                                                                                  | 0                                                                                                                                                                                                                                                                                                                                                                                                                                                                                                                                                                                                                                                                                                                                                                                                                                                                                                                                                                                                                                                                                                                                                                                                                                                                                                                                                                                                                                                                                                                                                                                                                                                                                                                                                                                                                                                                                                                                                                                                                                                                                                                                                                                                                                                                                                                                                                                                                                                                                                                                                                                                                                                                                                                                                                                                                             |             |   |   |                                 |   |   |             |   |   |                     |   |   |                                   |   |   |                   |   |   |                     |   |   |             |   |   |             |   |   |                                 |   |   |                 |   |   |                              |   |   |                                 |   |   |                |   |   |                        |   |   |                                      |   |   |              |   |   |                |   |   |                    |   |   |                |   |   |             |   |   |              |   |   |                                      |   |   |  |
| H. PAP.....                          | 1                                                                                                                                                                                                                                                  | 0                                                                                                                                                                                                                                                                                                                                                                                                                                                                                                                                                                                                                                                                                                                                                                                                                                                                                                                                                                                                                                                                                                                                                                                                                                                                                                                                                                                                                                                                                                                                                                                                                                                                                                                                                                                                                                                                                                                                                                                                                                                                                                                                                                                                                                                                                                                                                                                                                                                                                                                                                                                                                                                                                                                                                                                                                             |             |   |   |                                 |   |   |             |   |   |                     |   |   |                                   |   |   |                   |   |   |                     |   |   |             |   |   |             |   |   |                                 |   |   |                 |   |   |                              |   |   |                                 |   |   |                |   |   |                        |   |   |                                      |   |   |              |   |   |                |   |   |                    |   |   |                |   |   |             |   |   |              |   |   |                                      |   |   |  |
| I. INFANT FORMULA (GUIGOZ).....      | 1                                                                                                                                                                                                                                                  | 0                                                                                                                                                                                                                                                                                                                                                                                                                                                                                                                                                                                                                                                                                                                                                                                                                                                                                                                                                                                                                                                                                                                                                                                                                                                                                                                                                                                                                                                                                                                                                                                                                                                                                                                                                                                                                                                                                                                                                                                                                                                                                                                                                                                                                                                                                                                                                                                                                                                                                                                                                                                                                                                                                                                                                                                                                             |             |   |   |                                 |   |   |             |   |   |                     |   |   |                                   |   |   |                   |   |   |                     |   |   |             |   |   |             |   |   |                                 |   |   |                 |   |   |                              |   |   |                                 |   |   |                |   |   |                        |   |   |                                      |   |   |              |   |   |                |   |   |                    |   |   |                |   |   |             |   |   |              |   |   |                                      |   |   |  |
| J. CERELAC.....                      | 1                                                                                                                                                                                                                                                  | 0                                                                                                                                                                                                                                                                                                                                                                                                                                                                                                                                                                                                                                                                                                                                                                                                                                                                                                                                                                                                                                                                                                                                                                                                                                                                                                                                                                                                                                                                                                                                                                                                                                                                                                                                                                                                                                                                                                                                                                                                                                                                                                                                                                                                                                                                                                                                                                                                                                                                                                                                                                                                                                                                                                                                                                                                                             |             |   |   |                                 |   |   |             |   |   |                     |   |   |                                   |   |   |                   |   |   |                     |   |   |             |   |   |             |   |   |                                 |   |   |                 |   |   |                              |   |   |                                 |   |   |                |   |   |                        |   |   |                                      |   |   |              |   |   |                |   |   |                    |   |   |                |   |   |             |   |   |              |   |   |                                      |   |   |  |
| K. FRESH MILK FROM COWS.....         | 1                                                                                                                                                                                                                                                  | 0                                                                                                                                                                                                                                                                                                                                                                                                                                                                                                                                                                                                                                                                                                                                                                                                                                                                                                                                                                                                                                                                                                                                                                                                                                                                                                                                                                                                                                                                                                                                                                                                                                                                                                                                                                                                                                                                                                                                                                                                                                                                                                                                                                                                                                                                                                                                                                                                                                                                                                                                                                                                                                                                                                                                                                                                                             |             |   |   |                                 |   |   |             |   |   |                     |   |   |                                   |   |   |                   |   |   |                     |   |   |             |   |   |             |   |   |                                 |   |   |                 |   |   |                              |   |   |                                 |   |   |                |   |   |                        |   |   |                                      |   |   |              |   |   |                |   |   |                    |   |   |                |   |   |             |   |   |              |   |   |                                      |   |   |  |
| L. LIQUID OR POWDERED MILK.....      | 1                                                                                                                                                                                                                                                  | 0                                                                                                                                                                                                                                                                                                                                                                                                                                                                                                                                                                                                                                                                                                                                                                                                                                                                                                                                                                                                                                                                                                                                                                                                                                                                                                                                                                                                                                                                                                                                                                                                                                                                                                                                                                                                                                                                                                                                                                                                                                                                                                                                                                                                                                                                                                                                                                                                                                                                                                                                                                                                                                                                                                                                                                                                                             |             |   |   |                                 |   |   |             |   |   |                     |   |   |                                   |   |   |                   |   |   |                     |   |   |             |   |   |             |   |   |                                 |   |   |                 |   |   |                              |   |   |                                 |   |   |                |   |   |                        |   |   |                                      |   |   |              |   |   |                |   |   |                    |   |   |                |   |   |             |   |   |              |   |   |                                      |   |   |  |
| M. YOGURT.....                       | 1                                                                                                                                                                                                                                                  | 0                                                                                                                                                                                                                                                                                                                                                                                                                                                                                                                                                                                                                                                                                                                                                                                                                                                                                                                                                                                                                                                                                                                                                                                                                                                                                                                                                                                                                                                                                                                                                                                                                                                                                                                                                                                                                                                                                                                                                                                                                                                                                                                                                                                                                                                                                                                                                                                                                                                                                                                                                                                                                                                                                                                                                                                                                             |             |   |   |                                 |   |   |             |   |   |                     |   |   |                                   |   |   |                   |   |   |                     |   |   |             |   |   |             |   |   |                                 |   |   |                 |   |   |                              |   |   |                                 |   |   |                |   |   |                        |   |   |                                      |   |   |              |   |   |                |   |   |                    |   |   |                |   |   |             |   |   |              |   |   |                                      |   |   |  |
| N. CUSTARD POWDER.....               | 1                                                                                                                                                                                                                                                  | 0                                                                                                                                                                                                                                                                                                                                                                                                                                                                                                                                                                                                                                                                                                                                                                                                                                                                                                                                                                                                                                                                                                                                                                                                                                                                                                                                                                                                                                                                                                                                                                                                                                                                                                                                                                                                                                                                                                                                                                                                                                                                                                                                                                                                                                                                                                                                                                                                                                                                                                                                                                                                                                                                                                                                                                                                                             |             |   |   |                                 |   |   |             |   |   |                     |   |   |                                   |   |   |                   |   |   |                     |   |   |             |   |   |             |   |   |                                 |   |   |                 |   |   |                              |   |   |                                 |   |   |                |   |   |                        |   |   |                                      |   |   |              |   |   |                |   |   |                    |   |   |                |   |   |             |   |   |              |   |   |                                      |   |   |  |
| O. COOKED, MASHED FOODS. (FUFU)..... | 1                                                                                                                                                                                                                                                  | 0                                                                                                                                                                                                                                                                                                                                                                                                                                                                                                                                                                                                                                                                                                                                                                                                                                                                                                                                                                                                                                                                                                                                                                                                                                                                                                                                                                                                                                                                                                                                                                                                                                                                                                                                                                                                                                                                                                                                                                                                                                                                                                                                                                                                                                                                                                                                                                                                                                                                                                                                                                                                                                                                                                                                                                                                                             |             |   |   |                                 |   |   |             |   |   |                     |   |   |                                   |   |   |                   |   |   |                     |   |   |             |   |   |             |   |   |                                 |   |   |                 |   |   |                              |   |   |                                 |   |   |                |   |   |                        |   |   |                                      |   |   |              |   |   |                |   |   |                    |   |   |                |   |   |             |   |   |              |   |   |                                      |   |   |  |
| P. RICE.....                         | 1                                                                                                                                                                                                                                                  | 0                                                                                                                                                                                                                                                                                                                                                                                                                                                                                                                                                                                                                                                                                                                                                                                                                                                                                                                                                                                                                                                                                                                                                                                                                                                                                                                                                                                                                                                                                                                                                                                                                                                                                                                                                                                                                                                                                                                                                                                                                                                                                                                                                                                                                                                                                                                                                                                                                                                                                                                                                                                                                                                                                                                                                                                                                             |             |   |   |                                 |   |   |             |   |   |                     |   |   |                                   |   |   |                   |   |   |                     |   |   |             |   |   |             |   |   |                                 |   |   |                 |   |   |                              |   |   |                                 |   |   |                |   |   |                        |   |   |                                      |   |   |              |   |   |                |   |   |                    |   |   |                |   |   |             |   |   |              |   |   |                                      |   |   |  |
| Q. FRUITS.....                       | 1                                                                                                                                                                                                                                                  | 0                                                                                                                                                                                                                                                                                                                                                                                                                                                                                                                                                                                                                                                                                                                                                                                                                                                                                                                                                                                                                                                                                                                                                                                                                                                                                                                                                                                                                                                                                                                                                                                                                                                                                                                                                                                                                                                                                                                                                                                                                                                                                                                                                                                                                                                                                                                                                                                                                                                                                                                                                                                                                                                                                                                                                                                                                             |             |   |   |                                 |   |   |             |   |   |                     |   |   |                                   |   |   |                   |   |   |                     |   |   |             |   |   |             |   |   |                                 |   |   |                 |   |   |                              |   |   |                                 |   |   |                |   |   |                        |   |   |                                      |   |   |              |   |   |                |   |   |                    |   |   |                |   |   |             |   |   |              |   |   |                                      |   |   |  |
| R. VEGETABLES.....                   | 1                                                                                                                                                                                                                                                  | 0                                                                                                                                                                                                                                                                                                                                                                                                                                                                                                                                                                                                                                                                                                                                                                                                                                                                                                                                                                                                                                                                                                                                                                                                                                                                                                                                                                                                                                                                                                                                                                                                                                                                                                                                                                                                                                                                                                                                                                                                                                                                                                                                                                                                                                                                                                                                                                                                                                                                                                                                                                                                                                                                                                                                                                                                                             |             |   |   |                                 |   |   |             |   |   |                     |   |   |                                   |   |   |                   |   |   |                     |   |   |             |   |   |             |   |   |                                 |   |   |                 |   |   |                              |   |   |                                 |   |   |                |   |   |                        |   |   |                                      |   |   |              |   |   |                |   |   |                    |   |   |                |   |   |             |   |   |              |   |   |                                      |   |   |  |
| S. BEANS .....                       | 1                                                                                                                                                                                                                                                  | 0                                                                                                                                                                                                                                                                                                                                                                                                                                                                                                                                                                                                                                                                                                                                                                                                                                                                                                                                                                                                                                                                                                                                                                                                                                                                                                                                                                                                                                                                                                                                                                                                                                                                                                                                                                                                                                                                                                                                                                                                                                                                                                                                                                                                                                                                                                                                                                                                                                                                                                                                                                                                                                                                                                                                                                                                                             |             |   |   |                                 |   |   |             |   |   |                     |   |   |                                   |   |   |                   |   |   |                     |   |   |             |   |   |             |   |   |                                 |   |   |                 |   |   |                              |   |   |                                 |   |   |                |   |   |                        |   |   |                                      |   |   |              |   |   |                |   |   |                    |   |   |                |   |   |             |   |   |              |   |   |                                      |   |   |  |
| T. EGG.....                          | 1                                                                                                                                                                                                                                                  | 0                                                                                                                                                                                                                                                                                                                                                                                                                                                                                                                                                                                                                                                                                                                                                                                                                                                                                                                                                                                                                                                                                                                                                                                                                                                                                                                                                                                                                                                                                                                                                                                                                                                                                                                                                                                                                                                                                                                                                                                                                                                                                                                                                                                                                                                                                                                                                                                                                                                                                                                                                                                                                                                                                                                                                                                                                             |             |   |   |                                 |   |   |             |   |   |                     |   |   |                                   |   |   |                   |   |   |                     |   |   |             |   |   |             |   |   |                                 |   |   |                 |   |   |                              |   |   |                                 |   |   |                |   |   |                        |   |   |                                      |   |   |              |   |   |                |   |   |                    |   |   |                |   |   |             |   |   |              |   |   |                                      |   |   |  |
| U. STEW.....                         | 1                                                                                                                                                                                                                                                  | 0                                                                                                                                                                                                                                                                                                                                                                                                                                                                                                                                                                                                                                                                                                                                                                                                                                                                                                                                                                                                                                                                                                                                                                                                                                                                                                                                                                                                                                                                                                                                                                                                                                                                                                                                                                                                                                                                                                                                                                                                                                                                                                                                                                                                                                                                                                                                                                                                                                                                                                                                                                                                                                                                                                                                                                                                                             |             |   |   |                                 |   |   |             |   |   |                     |   |   |                                   |   |   |                   |   |   |                     |   |   |             |   |   |             |   |   |                                 |   |   |                 |   |   |                              |   |   |                                 |   |   |                |   |   |                        |   |   |                                      |   |   |              |   |   |                |   |   |                    |   |   |                |   |   |             |   |   |              |   |   |                                      |   |   |  |
| V. OTHER LIQUIDS OR FOODS, SPECIFY.. | 1                                                                                                                                                                                                                                                  | 0                                                                                                                                                                                                                                                                                                                                                                                                                                                                                                                                                                                                                                                                                                                                                                                                                                                                                                                                                                                                                                                                                                                                                                                                                                                                                                                                                                                                                                                                                                                                                                                                                                                                                                                                                                                                                                                                                                                                                                                                                                                                                                                                                                                                                                                                                                                                                                                                                                                                                                                                                                                                                                                                                                                                                                                                                             |             |   |   |                                 |   |   |             |   |   |                     |   |   |                                   |   |   |                   |   |   |                     |   |   |             |   |   |             |   |   |                                 |   |   |                 |   |   |                              |   |   |                                 |   |   |                |   |   |                        |   |   |                                      |   |   |              |   |   |                |   |   |                    |   |   |                |   |   |             |   |   |              |   |   |                                      |   |   |  |
| <p><b>Q212</b></p>                   | <p><i>At what age did you give baby other food in addition to breast milk?</i></p> <p><b>SOLID, SEMI-SOLID, AND SOFT FOODS ARE DEFINED AS MUSHY OR SOLID FOODS, NOT FLUIDS.</b></p>                                                                | <p>BABY IS NOT TAKING ANY SOLID FOODS.. 00</p> <p>AGE IN MONTHS WHEN BABY FIRST TOOK SOLID OR SEMI-SOLID FOODS.... [ ____   ____ ]</p> <p>DON'T KNOW.....98</p>                                                                                                                                                                                                                                                                                                                                                                                                                                                                                                                                                                                                                                                                                                                                                                                                                                                                                                                                                                                                                                                                                                                                                                                                                                                                                                                                                                                                                                                                                                                                                                                                                                                                                                                                                                                                                                                                                                                                                                                                                                                                                                                                                                                                                                                                                                                                                                                                                                                                                                                                                                                                                                                               | <p>→301</p> |   |   |                                 |   |   |             |   |   |                     |   |   |                                   |   |   |                   |   |   |                     |   |   |             |   |   |             |   |   |                                 |   |   |                 |   |   |                              |   |   |                                 |   |   |                |   |   |                        |   |   |                                      |   |   |              |   |   |                |   |   |                    |   |   |                |   |   |             |   |   |              |   |   |                                      |   |   |  |
| <p><b>Q213</b></p>                   | <p><i>How many times did [NAME] eat foods other than liquids yesterday during the day or at night?</i></p> <p><b>SMALL SNACKS AND SMALL FEEDS SUCH AS ONE OR TWO BITES OF MOTHER'S OR SIBLING'S FOOD SHOULD NOT BE COUNTED.</b></p>                | <p>CHILD NEVER TOOK SOLID, OR SEMI-SOLID FOOD.....00</p> <p>1 TIME.....01</p> <p>2 TIMES.....02</p> <p>3 TIMES.....03</p> <p>FOUR OR MORE TIMES.....04</p> <p>DON'T KNOW.....98</p>                                                                                                                                                                                                                                                                                                                                                                                                                                                                                                                                                                                                                                                                                                                                                                                                                                                                                                                                                                                                                                                                                                                                                                                                                                                                                                                                                                                                                                                                                                                                                                                                                                                                                                                                                                                                                                                                                                                                                                                                                                                                                                                                                                                                                                                                                                                                                                                                                                                                                                                                                                                                                                           |             |   |   |                                 |   |   |             |   |   |                     |   |   |                                   |   |   |                   |   |   |                     |   |   |             |   |   |             |   |   |                                 |   |   |                 |   |   |                              |   |   |                                 |   |   |                |   |   |                        |   |   |                                      |   |   |              |   |   |                |   |   |                    |   |   |                |   |   |             |   |   |              |   |   |                                      |   |   |  |

|                                                          |                                                                     |                                   |        |   |
|----------------------------------------------------------|---------------------------------------------------------------------|-----------------------------------|--------|---|
| <b>Q214</b>                                              | <i>Is the baby taking anything else in addition to breast milk?</i> | (Y=YES, N=NO)                     |        |   |
|                                                          |                                                                     |                                   | Y    N |   |
|                                                          |                                                                     | A. VITAMIN DROPS/MEDICINE .....   | 1      | 0 |
|                                                          |                                                                     | B. ORS.....                       | 1      | 0 |
|                                                          |                                                                     | C. PLAIN WATER.....               | 1      | 0 |
|                                                          |                                                                     | D. SUGAR WATER/ SWEET DRINKS..... | 1      | 0 |
|                                                          |                                                                     | E. PALM WINE.....                 | 1      | 0 |
|                                                          |                                                                     | F. FRUIT JUICE.....               | 1      | 0 |
|                                                          |                                                                     | G. TEA.....                       | 1      | 0 |
|                                                          |                                                                     | H. PAP.....                       | 1      | 0 |
|                                                          |                                                                     | I. INFANT FORMULA (GUIGOZ).....   | 1      | 0 |
|                                                          |                                                                     | J. CERELAC.....                   | 1      | 0 |
|                                                          |                                                                     | K. FRESH MILK FROM COWS.....      | 1      | 0 |
|                                                          |                                                                     | L. LIQUID OR POWDERED MILK.....   | 1      | 0 |
|                                                          |                                                                     | M. YOGURT.....                    | 1      | 0 |
| N. CUSTARD POWDER.....                                   | 1                                                                   | 0                                 |        |   |
| O. COOKED, MASHED FOODS. (FUFU).....                     | 1                                                                   | 0                                 |        |   |
| P. RICE.....                                             | 1                                                                   | 0                                 |        |   |
| Q. FRUITS.....                                           | 1                                                                   | 0                                 |        |   |
| R. VEGETABLES.....                                       | 1                                                                   | 0                                 |        |   |
| S. BEANS .....                                           | 1                                                                   | 0                                 |        |   |
| T. EGG.....                                              | 1                                                                   | 0                                 |        |   |
| U. STEW.....                                             | 1                                                                   | 0                                 |        |   |
| V. OTHER LIQUIDS OR FOODS, SPECIFY..                     | 1                                                                   | 0                                 |        |   |
| <b>DO NOT READ OUT, PROBE AND CIRCLE A CODE FOR EACH</b> |                                                                     |                                   |        |   |

### Section 3: Client Satisfaction

|             |                                                                                                                         |                                                                                                                                                                                 |              |
|-------------|-------------------------------------------------------------------------------------------------------------------------|---------------------------------------------------------------------------------------------------------------------------------------------------------------------------------|--------------|
| <b>Q301</b> | <i>At today's visit or during your stay at the health center did anyone talk to you about how to feed the baby?</i>     | YES.....01<br>NO.....00<br>DON'T KNOW.....98                                                                                                                                    | <b>➔ 401</b> |
| <b>Q302</b> | <i>What type of health worker talked to you?</i><br><b>CIRCLE YES FOR ANY HEALTH WORKER WHO TALKED TO THE CAREGIVER</b> | Y= YES, N=NO<br>Y    N<br>NURSE/MIDWIFE.....1    0<br>NUTRITION COUNSELOR.....1    0<br>DOCTOR.....1    0<br>PEER EDUCATOR.....1    0<br><b>OTHER, SPECIFY _____.....1    0</b> |              |
| <b>Q303</b> | <i>Were you satisfied with the information you received about how to feed [NAME]?</i>                                   | VERY SATISFIED.....03<br>SATISFIED.....02<br>UNCERTAIN.....01<br>NOT SATISFIED.....00                                                                                           |              |



### Section 4: Anthropometrics

*If the child was weighed at today's clinic visit, ask to look at the child's clinic book and enter the child's weight and height below. If the child was not weighed and measured, weigh and measure the child.*

*Recumbent length will be measured to the nearest millimeter using horizontal boards. **All infant weight and length measurements should be taken in duplicate.** If differences between measurements exist, a third measurement will be taken to ensure accuracy. Weights must agree within 0.1 kg.; length t to the nearest .1 cm.*

|             |                                    |                                                                                                           |       |
|-------------|------------------------------------|-----------------------------------------------------------------------------------------------------------|-------|
| <b>Q401</b> | <i>May I weigh (Name)?</i>         | YES.....01<br>NO.....00<br><div style="text-align: right; margin-top: 10px;"> _   _ .  _  KILOGRAMS</div> | ➡ END |
| <b>Q402</b> | <i>May I take (Name)'s height?</i> | YES.....01<br>NO.....00<br><div style="text-align: right; margin-top: 10px;"> _   _ _ .  _  CM</div>      | ➡ END |

### Section 5: General remarks from respondent

If the respondent has makes any comments or asks any questions please record them here in verbatim:

---

---

---

---

---

---

---

---

---

---

---

---

***That is the end of our questionnaire. Thank you very much for taking time to answer these questions. We appreciate your help. Please do not discuss the details of this interview with anybody for the next two weeks. This is because we intend to interview other people about the same issues. If asked by a friend, neighbor or relative about what we discussed please tell them it was about infant feeding and nutrition counseling.***
